# Supplementary material for: EnHERV: Enrichment analysis of specific human endogenous retrovirus patterns and their neighboring genes
Source: PLoS One. 2017 May 4;12(5):e0177119. doi: 10.1371/journal.pone.0177119 (PMC5417679; doi:10.1371/journal.pone.0177119)
Supplement: S3 Table — Significant data with odds ratio >1 and Fisher’s p-value <0.001 are indicated in in green letters for up-regulated genes and red letters for down-regulated genes. (XLSX) [file pone.0177119.s005.xlsx]

## Sheet: ltr
Table S3. Association analysis results between various gene expression conditions and individual HERVs that represent each superfamily . Significant data with odds ratio >1 and Fisher’s p-value <0.001 are indicated in in green letters for up-regulated genes and red letters for down-regulated genes.
GEO accession	hervList	ERV1
		ERV9												HERVH						HERVW																		HUERSP1						LOR1
		LTR12						LTR12C						LTR7						LTR2						LTR2B						LTR2C						LTR8						LOR1a
		Down DEG			Up DEG			Down DEG			Up DEG			Down DEG			Up DEG			Down DEG			Up DEG			Down DEG			Up DEG			Down DEG			Up DEG			Down DEG			Up DEG			Down DEG			Up DEG
		odd	p-value	CI	odd	p-value	CI	odd	p-value	CI	odd	p-value	CI	odd	p-value	CI	odd	p-value	CI	odd	p-value	CI	odd	p-value	CI	odd	p-value	CI	odd	p-value	CI	odd	p-value	CI	odd	p-value	CI	odd	p-value	CI	odd	p-value	CI	odd	p-value	CI	odd	p-value	CI
SLE_GSE4588_B	All	0.7765	0.12129	0.5714,1.0551	1.1335	0.432433	0.8195,1.5677	0.7849	0.0122752	0.6491,0.9490	0.9889	0.955853	0.7952,1.2297	0.686	0.0366521	0.4802,0.9800	1.1409	0.443234	0.8000,1.6270	0.6092	0.00129619	0.4440,0.8358	1.2001	0.223059	0.8931,1.6126	0.7706	0.283122	0.5020,1.1828	1.3516	0.147481	0.8934,2.0448	0.9306	0.777373	0.6351,1.3635	1.0974	0.639187	0.7065,1.7046	0.729	0.00076202	0.6045,0.8791	0.7578	0.0161838	0.6023,0.9534	0.8928	0.596859	0.6207,1.2840	0.7576	0.323283	0.4659,1.2319
	Sense	0.8644	0.569335	0.5820,1.2839	1.1027	0.638	0.7099,1.7129	0.8255	0.141659	0.6439,1.0583	1.0302	0.826901	0.7769,1.3661	0.5853	0.0385749	0.3496,0.9800	0.7385	0.369678	0.4151,1.3138	0.6114	0.0306336	0.3863,0.9676	1.2499	0.292845	0.8265,1.8901	0.5265	0.0814277	0.2608,1.0628	1.1613	0.617896	0.6348,2.1243	1.1465	0.539033	0.7298,1.8011	1.4426	0.168025	0.8713,2.3885	0.7265	0.010155	0.5669,0.9310	0.8145	0.188173	0.6068,1.0933	0.7303	0.370236	0.4102,1.3000	1.0594	0.752762	0.5795,1.9367
	Anti-sense	0.6955	0.1195	0.4442,1.0889	1.0517	0.808923	0.6626,1.6693	0.7444	0.0238006	0.5768,0.9607	0.9516	0.829397	0.7143,1.2678	0.8132	0.452627	0.5130,1.2889	1.6653	0.0226447	1.0993,2.5227	0.6341	0.0260319	0.4209,0.9553	1.1054	0.595803	0.7429,1.6448	1.0468	0.787105	0.6227,1.7596	1.4319	0.235518	0.8195,2.5017	0.6554	0.262894	0.3374,1.2731	0.5677	0.295076	0.2341,1.3765	0.7774	0.0348834	0.6156,0.9817	0.7336	0.0439743	0.5451,0.9872	1.0219	0.907304	0.6511,1.6039	0.626	0.246502	0.3101,1.2636
	Intragenic	1.5567	0.115999	0.8874,2.7307	1.4788	0.271955	0.7279,3.0043	1.4124	0.0959157	0.9476,2.1052	1.7035	0.0265619	1.0823,2.6815	1.3478	0.399863	0.6612,2.7474	1.8547	0.113903	0.8672,3.9667	0.7981	0.710299	0.3537,1.8012	1.2633	0.485896	0.5590,2.8549	1.2705	0.562158	0.4656,3.4668	4.2341	0.0010233	2.0420,8.7791	1.5423	0.451331	0.4816,4.9385	1.5929	0.364886	0.3878,6.5420	1.0382	0.823165	0.6751,1.5966	1.2609	0.331371	0.7735,2.0555	1.5246	0.239142	0.7107,3.2704	1.693	0.231187	0.6907,4.1495
	Intergenic	0.7123	0.0470358	0.5107,0.9935	1.1157	0.523312	0.7937,1.5685	0.7498	0.003893	0.6150,0.9141	0.9332	0.609359	0.7431,1.1719	0.6045	0.00973991	0.4077,0.8963	1.2107	0.316603	0.8443,1.7361	0.6028	0.00147949	0.4342,0.8367	1.1431	0.402107	0.8381,1.5589	0.7389	0.228902	0.4718,1.1573	1.1796	0.455751	0.7512,1.8523	0.9695	1	0.6615,1.4208	1.0853	0.719466	0.6915,1.7035	0.7336	0.00122771	0.6052,0.8892	0.7325	0.00983339	0.5766,0.9306	0.9094	0.712919	0.6248,1.3238	0.6759	0.170638	0.3963,1.1527
SLE_GSE10325_B	All	0.9081	1	0.4633,1.7798	1.3123	0.343952	0.7598,2.2666	0.6173	0.0589252	0.3785,1.0068	1.0731	0.690953	0.7330,1.5708	0.7331	0.587085	0.3241,1.6583	1.3735	0.297456	0.7636,2.4706	0.5918	0.218117	0.2774,1.2626	1.9377	0.00514226	1.2501,3.0035	0.7953	0.821401	0.2944,2.1489	0.7183	0.665855	0.2661,1.9387	1.1344	0.658401	0.5010,2.5685	0.6734	0.670237	0.2495,1.8171	0.8455	0.480896	0.5565,1.2844	0.9993	1	0.6859,1.4561	0.3178	0.0974904	0.0787,1.2828	1.1944	0.554494	0.5868,2.4312
	Sense	1.1398	0.657121	0.5034,2.5808	1.3893	0.392287	0.6822,2.8292	0.5272	0.0738452	0.2590,1.0731	0.8618	0.694797	0.4993,1.4873	0.443	0.334037	0.1097,1.7891	1.0218	0.819118	0.4191,2.4914	0.1804	0.0472092	0.0252,1.2892	1.9169	0.0538702	1.0390,3.5367	1.1427	0.749295	0.3635,3.5927	0.339	0.377528	0.0474,2.4246	1.2916	0.558218	0.4773,3.4947	0.5748	0.590632	0.1423,2.3215	0.9139	0.895808	0.5373,1.5542	1.1912	0.454313	0.7557,1.8778	0	0.124221	0.0787,1.2828	0.9436	1	0.3005,2.9629
	Anti-sense	0.5908	0.495283	0.1882,1.8540	1.2792	0.510376	0.5994,2.7296	0.7128	0.342223	0.3865,1.3145	1.4438	0.11968	0.9320,2.2367	1.2272	0.610485	0.5026,2.9968	1.8098	0.0958273	0.8879,3.6888	0.9139	1	0.4038,2.0681	1.7141	0.0825422	0.9524,3.0850	0.3874	0.526065	0.0541,2.7727	1.0678	0.761331	0.3399,3.3546	0.8317	1	0.2056,3.3646	0.752	1	0.1860,3.0398	0.9051	0.800723	0.5404,1.5161	0.9815	1	0.6102,1.5790	0.5688	0.59038	0.1408,2.2985	1.3135	0.440192	0.5383,3.2054
	Intragenic	0.6559	1	0.0915,4.7016	0	0.420372	0.5994,2.7296	0.2943	0.269625	0.0411,2.1051	1.3701	0.423343	0.5614,3.3439	0.9357	1	0.1303,6.7184	2.5965	0.114844	0.8218,8.2030	0.7535	1	0.1051,5.4042	0.6817	1	0.0951,4.8865	0	1	0.0541,2.7727	3.2829	0.128888	0.8028,13.4244	0	1	0.2056,3.3646	0	1	0.1860,3.0398	1.0635	0.792195	0.3933,2.8756	1.2091	0.614217	0.4956,2.9496	0	1	0.1408,2.2985	2.2094	0.233826	0.5430,8.9909
	Intergenic	0.8837	0.864269	0.4338,1.8002	1.4469	0.187896	0.8376,2.4995	0.6621	0.107608	0.4060,1.0798	1.0651	0.759466	0.7203,1.5749	0.8028	0.849225	0.3548,1.8163	1.3705	0.281498	0.7436,2.5260	0.54	0.154706	0.2388,1.2209	2.0775	0.00227934	1.3401,3.2207	0.8418	1	0.3115,2.2749	0.7603	0.82247	0.2817,2.0523	1.1806	0.64869	0.5214,2.6733	0.7007	0.666685	0.2596,1.8910	0.874	0.604969	0.5714,1.3369	0.9265	0.767981	0.6233,1.3773	0.3466	0.133808	0.0859,1.3995	1.3035	0.411452	0.6402,2.6540
SLE_GSE4588_CD4	All	1.1774	0.246706	0.8870,1.5628	1.0822	0.561729	0.8220,1.4249	0.7714	0.0140657	0.6251,0.9518	0.8149	0.0380975	0.6716,0.9887	0.7616	0.173553	0.5235,1.1079	0.8573	0.424993	0.6141,1.1969	0.893	0.516853	0.6645,1.2001	1.0972	0.457912	0.8503,1.4158	0.7229	0.237626	0.4448,1.1748	0.9835	1	0.6617,1.4617	0.8024	0.405361	0.5121,1.2571	0.5893	0.0314084	0.3630,0.9568	0.8804	0.217976	0.7256,1.0682	0.8754	0.155196	0.7300,1.0497	0.6197	0.041619	0.3867,0.9930	0.5393	0.00625629	0.3368,0.8637
	Sense	1.1516	0.465468	0.7850,1.6894	1.2324	0.240703	0.8690,1.7478	0.7349	0.0330483	0.5517,0.9790	0.8862	0.363826	0.6908,1.1367	0.6194	0.0891351	0.3563,1.0769	0.6692	0.135203	0.4059,1.1031	1.0034	0.91798	0.6699,1.5028	1.0213	0.846807	0.7012,1.4876	0.6453	0.302588	0.3195,1.3034	1.0055	0.891233	0.5879,1.7196	0.7522	0.419488	0.4122,1.3728	0.5329	0.0576609	0.2748,1.0337	1.0085	0.951051	0.7935,1.2817	0.8559	0.226452	0.6735,1.0877	0.5891	0.159888	0.2918,1.1891	0.3178	0.0036039	0.1313,0.7691
	Anti-sense	1.2216	0.285605	0.8324,1.7927	0.9011	0.688896	0.5971,1.3599	0.9255	0.610757	0.7157,1.1967	0.8261	0.151802	0.6420,1.0631	0.889	0.72431	0.5464,1.4463	1.064	0.740055	0.6983,1.6212	0.7802	0.260087	0.5173,1.1766	1.138	0.427378	0.8209,1.5778	0.8408	0.765043	0.4472,1.5806	0.9629	1	0.5521,1.6793	0.8034	0.645183	0.4133,1.5617	0.6202	0.246892	0.3070,1.2529	0.9146	0.513378	0.7188,1.1637	0.8591	0.219944	0.6816,1.0828	0.6088	0.126063	0.3245,1.1423	0.6959	0.230543	0.3999,1.2108
	Intragenic	1.2936	0.437698	0.6625,2.5259	1.3929	0.27592	0.7583,2.5585	1.036	0.895943	0.6269,1.7120	1.4485	0.0853464	0.9645,2.1756	0.5977	0.495139	0.1905,1.8754	1.065	0.828522	0.4705,2.4104	1.4934	0.216327	0.7635,2.9214	1.0006	1	0.4699,2.1309	0.3748	0.525524	0.0522,2.6925	2.4662	0.0300808	1.1383,5.3436	1.2346	0.679038	0.3008,5.0681	0.5286	1	0.0731,3.8220	0.8525	0.624286	0.5083,1.4299	1.2183	0.355327	0.8057,1.8421	1.3107	0.441133	0.5352,3.2103	1.384	0.45779	0.6090,3.1453
	Intergenic	1.2202	0.195808	0.9120,1.6325	1.0562	0.704828	0.7903,1.4115	0.7905	0.0304738	0.6383,0.9791	0.7914	0.0207478	0.6477,0.9671	0.7744	0.215343	0.5253,1.1416	0.8865	0.560778	0.6292,1.2490	0.9149	0.604234	0.6767,1.2370	1.099	0.486251	0.8454,1.4288	0.7659	0.322774	0.4712,1.2450	0.9155	0.757483	0.6014,1.3936	0.7482	0.288716	0.4665,1.2000	0.5761	0.0283466	0.3497,0.9491	0.8905	0.263537	0.7306,1.0855	0.8456	0.0830415	0.7000,1.0214	0.5601	0.0255197	0.3346,0.9375	0.5214	0.00763148	0.3166,0.8585
SLE_GSE10325_T	All	1.4152	0.355037	0.6530,3.0670	1.0258	0.84397	0.4773,2.2045	1.7536	0.0279758	1.0822,2.8415	1.1973	0.451209	0.7532,1.9033	0.7123	0.800384	0.2250,2.2552	0.523	0.381632	0.1660,1.6473	0.3227	0.130196	0.0794,1.3121	0.8711	0.855229	0.4054,1.8718	2.0088	0.114962	0.8127,4.9653	0.2819	0.269583	0.0393,2.0200	1.4869	0.354383	0.5442,4.0623	0.8083	1	0.2564,2.5477	0.9698	1	0.5563,1.6907	0.8438	0.627982	0.5108,1.3940	0.6265	0.77257	0.1540,2.5488	0.4614	0.450133	0.1139,1.8693
	Sense	1.8919	0.199782	0.7655,4.6757	1.3804	0.420444	0.5624,3.3882	1.703	0.085612	0.9256,3.1335	1.4429	0.187258	0.8251,2.5233	0.4311	0.730936	0.0600,3.0990	0.6432	0.772865	0.1587,2.6071	0.3536	0.531168	0.0492,2.5413	0.7989	1	0.2535,2.5178	0.7346	1	0.1021,5.2854	0	0.269232	0.0393,2.0200	1.2532	0.676149	0.3077,5.1050	1.3991	0.480076	0.4433,4.4157	0.8217	0.854826	0.3794,1.7797	0.7802	0.636787	0.3951,1.5407	1.3614	0.661308	0.3341,5.5468	0.496	0.726473	0.0692,3.5580
	Anti-sense	0.771	1	0.1895,3.1373	0.86	1	0.2728,2.7111	2.3133	0.00424901	1.3446,3.9801	1.1692	0.624143	0.6431,2.1259	0.9465	1	0.2325,3.8530	0.3451	0.536815	0.0481,2.4737	0.2885	0.265986	0.0402,2.0733	0.8771	1	0.3231,2.3810	3.1683	0.0426653	1.1569,8.6769	0.561	1	0.0782,4.0254	1.6397	0.349951	0.4022,6.6845	0	0.418896	0.4433,4.4157	1.1253	0.723457	0.5822,2.1751	0.7197	0.446639	0.3644,1.4211	0	0.429351	0.3341,5.5468	0.4087	0.73681	0.0570,2.9307
	Intragenic	0	1	0.1895,3.1373	0	0.630332	0.2728,2.7111	0.577	1	0.0802,4.1494	1.7587	0.29808	0.6468,4.7823	1.8344	0.424157	0.2541,13.2420	1.355	0.525061	0.1882,9.7535	0	1	0.0402,2.0733	0	1	0.3231,2.3810	3.4995	0.252644	0.4824,25.3892	0	1	0.0782,4.0254	0	1	0.4022,6.6845	0	1	0.4433,4.4157	1.0326	0.720801	0.2536,4.2044	1.1524	0.747709	0.3653,3.6351	0	1	0.3341,5.5468	3.5478	0.113626	0.8681,14.4998
	Intergenic	1.5597	0.230735	0.7196,3.3806	1.1305	0.679424	0.5260,2.4299	1.8807	0.0157745	1.1606,3.0476	1.213	0.439734	0.7566,1.9448	0.7799	1	0.2463,2.4694	0.5726	0.494423	0.1818,1.8037	0.3458	0.18072	0.0850,1.4058	0.9334	1	0.4344,2.0058	1.6789	0.310662	0.6143,4.5881	0.2983	0.388145	0.0416,2.1378	1.5472	0.338348	0.5663,4.2275	0.8411	1	0.2668,2.6511	0.9665	1	0.5458,1.7116	0.7389	0.320564	0.4298,1.2704	0.6834	1	0.1680,2.7806	0.2493	0.191633	0.0348,1.7861
SLE_GSE13887_Tcells	All	0.7206	0.0387499	0.5287,0.9821	1.0072	0.950325	0.7896,1.2847	0.9002	0.256052	0.7540,1.0747	0.9111	0.26794	0.7766,1.0689	0.6746	0.027973	0.4748,0.9585	0.9518	0.784304	0.7238,1.2515	0.7016	0.0148482	0.5245,0.9384	0.7342	0.0173248	0.5673,0.9501	0.8396	0.446481	0.5611,1.2565	0.9925	1	0.7072,1.3929	0.5893	0.020521	0.3724,0.9326	0.6037	0.0119799	0.4008,0.9094	0.7988	0.0128323	0.6689,0.9539	0.9589	0.619813	0.8241,1.1157	0.879	0.545544	0.6146,1.2572	0.7508	0.117413	0.5308,1.0620
	Sense	0.7896	0.307438	0.5278,1.1812	0.8496	0.402279	0.5972,1.2087	0.8987	0.420902	0.7106,1.1366	0.9838	0.917164	0.8013,1.2079	0.7921	0.362954	0.5109,1.2282	0.8613	0.522097	0.5878,1.2620	0.6464	0.0529416	0.4174,1.0012	0.7547	0.156516	0.5221,1.0910	0.8961	0.79484	0.5242,1.5319	0.8285	0.55505	0.5012,1.3694	0.6394	0.149049	0.3595,1.1374	0.7388	0.276534	0.4540,1.2020	0.8937	0.353236	0.7148,1.1174	0.8926	0.299009	0.7292,1.0927	0.8782	0.709154	0.5231,1.4743	0.8046	0.430505	0.4942,1.3101
	Anti-sense	0.6624	0.0706446	0.4231,1.0369	1.1697	0.342674	0.8530,1.6040	0.8408	0.157324	0.6631,1.0661	0.8549	0.166196	0.6907,1.0582	0.6472	0.0929911	0.3926,1.0670	1.008	0.92444	0.6959,1.4601	0.7639	0.180283	0.5285,1.1041	0.7424	0.0952971	0.5299,1.0401	0.8583	0.691699	0.4923,1.4962	1.0864	0.718416	0.6909,1.7085	0.4822	0.0546409	0.2278,1.0210	0.3881	0.00632522	0.1834,0.8213	0.7485	0.0129088	0.5938,0.9436	1.0088	0.923736	0.8367,1.2162	0.871	0.649903	0.5424,1.3987	0.7403	0.217834	0.4670,1.1737
	Intragenic	0.6601	0.392879	0.2930,1.4874	1.4901	0.121285	0.8951,2.4806	0.443	0.0102551	0.2286,0.8587	1.3037	0.170964	0.9033,1.8816	0.4654	0.222602	0.1484,1.4596	1.5936	0.135541	0.8843,2.8716	0.8926	1	0.4193,1.9002	0.7184	0.506217	0.3376,1.5286	1.211	0.577238	0.4438,3.3042	0.9753	1	0.3576,2.6600	0.9616	1	0.2343,3.9459	0	0.184652	0.1834,0.8213	0.48	0.0115164	0.2635,0.8742	1.8072	0.00033151	1.3349,2.4465	0.8091	1	0.2987,2.1918	1.348	0.398974	0.6585,2.7595
	Intergenic	0.7563	0.0848779	0.5509,1.0384	0.9784	0.948134	0.7566,1.2652	0.9596	0.687073	0.8033,1.1464	0.909	0.273721	0.7716,1.0709	0.7402	0.0979112	0.5207,1.0522	0.9445	0.775313	0.7094,1.2576	0.7199	0.0292012	0.5351,0.9686	0.7476	0.031242	0.5742,0.9734	0.7778	0.282116	0.5067,1.1939	0.9589	0.929355	0.6735,1.3653	0.5801	0.0184695	0.3621,0.9293	0.6288	0.0261936	0.4174,0.9475	0.8243	0.0376931	0.6881,0.9876	0.8783	0.117034	0.7485,1.0308	0.8975	0.652837	0.6204,1.2984	0.7701	0.166245	0.5387,1.1007
SLE_GSE10325_myeloid	All	0.7629	0.54323	0.3903,1.4910	1.032	0.814808	0.6551,1.6258	0.7771	0.248685	0.5143,1.1742	1.0252	0.881198	0.7668,1.3705	0.6176	0.315517	0.2736,1.3940	1.9198	0.00176996	1.3069,2.8201	0.3518	0.0106864	0.1447,0.8556	1.0179	0.912714	0.6649,1.5582	1.1972	0.531917	0.5615,2.5524	0.8064	0.743229	0.3986,1.6315	0.6293	0.537084	0.2334,1.6970	1.1528	0.63348	0.6455,2.0590	0.8565	0.458735	0.5837,1.2568	1.1285	0.387204	0.8598,1.4813	1.1147	0.702222	0.5481,2.2667	0.8226	0.65817	0.4371,1.5480
	Sense	1.1274	0.681799	0.5289,2.4031	1.1584	0.632678	0.6485,2.0689	0.7408	0.373828	0.4217,1.3013	1.0526	0.768127	0.7220,1.5347	0.7588	0.822676	0.2812,2.0472	2.1462	0.0046799	1.3274,3.4700	0.4636	0.223688	0.1480,1.4524	1.1392	0.635798	0.6379,2.0346	1.2967	0.557256	0.4797,3.5048	0.5713	0.499876	0.1826,1.7873	0.8119	1	0.2588,2.5473	1.3135	0.409301	0.6479,2.6630	0.7631	0.398142	0.4504,1.2929	1.2841	0.13585	0.9211,1.7903	0.8821	1	0.2811,2.7684	0.522	0.3886	0.1669,1.6326
	Anti-sense	0.6696	0.671243	0.2483,1.8060	0.8044	0.743465	0.3976,1.6274	0.8943	0.802574	0.5359,1.4924	1.0902	0.628331	0.7558,1.5725	0.406	0.248602	0.1006,1.6378	1.6445	0.102023	0.9397,2.8778	0.3781	0.0947337	0.1207,1.1842	0.9275	1	0.5197,1.6553	1.341	0.549008	0.4961,3.6252	0.9953	1	0.4094,2.4197	0.349	0.536897	0.0488,2.4960	0.8433	1	0.3131,2.2715	0.9121	0.815616	0.5679,1.4649	1.0166	0.927928	0.7151,1.4454	1.2271	0.610724	0.5032,2.9923	1.0222	0.846138	0.4813,2.1708
	Intragenic	0.5551	1	0.0775,3.9758	0.3298	0.378816	0.0461,2.3576	1.28	0.602167	0.5248,3.1217	1.7089	0.106644	0.9316,3.1349	1.6009	0.359273	0.3945,6.4969	1.9322	0.160718	0.7129,5.2373	0.6377	1	0.0890,4.5699	0.7636	1	0.1890,3.0855	3.0702	0.143259	0.7511,12.5489	0	0.631784	0.4094,2.4197	2.4416	0.340899	0.3365,17.7182	0	1	0.3131,2.2715	0.6688	0.806651	0.2133,2.0970	1.6508	0.0915547	0.9228,2.9531	2.0663	0.256899	0.5080,8.4044	1.8571	0.225814	0.5885,5.8607
	Intergenic	0.7431	0.525602	0.3657,1.5098	1.0772	0.712518	0.6762,1.7162	0.7605	0.236207	0.4961,1.1657	1.0521	0.702572	0.7835,1.4128	0.4456	0.116453	0.1653,1.2009	2.1057	0.00060345	1.4329,3.0942	0.377	0.0194917	0.1550,0.9168	1.04	0.82144	0.6733,1.6063	1.0795	0.827316	0.4777,2.4395	0.8538	0.86645	0.4219,1.7278	0.4881	0.295676	0.1558,1.5293	1.2	0.517564	0.6718,2.1437	0.8921	0.633566	0.6048,1.3160	1.1071	0.460095	0.8363,1.4656	1.0578	0.841644	0.4963,2.2545	0.8979	0.877966	0.4770,1.6903
SLE_GSE27427_neutrophil	All	0.8802	0.437239	0.6574,1.1784	0.9398	0.690374	0.7194,1.2278	0.8453	0.0801344	0.7019,1.0179	0.9704	0.767521	0.8211,1.1470	0.6692	0.0293865	0.4659,0.9612	1.2365	0.124365	0.9511,1.6076	1.0144	0.895398	0.7852,1.3106	0.9584	0.804409	0.7489,1.2266	1.0801	0.695236	0.7458,1.5643	1.1492	0.407315	0.8182,1.6140	1.2664	0.183092	0.9053,1.7716	0.9786	1	0.6874,1.3931	0.9839	0.896729	0.8297,1.1667	1.0438	0.596439	0.8915,1.2220	0.5973	0.01656	0.3858,0.9248	0.7877	0.211242	0.5481,1.1322
	Sense	0.9076	0.703906	0.6153,1.3388	0.9516	0.858135	0.6650,1.3616	0.9416	0.679586	0.7432,1.1930	0.9993	1	0.8037,1.2423	0.6725	0.119664	0.4139,1.0926	1.111	0.558112	0.7713,1.6002	1.0339	0.850163	0.7183,1.4882	1.1897	0.286282	0.8613,1.6434	1.0201	0.893485	0.6070,1.7143	1.1479	0.528652	0.7218,1.8253	1.0953	0.711142	0.6895,1.7398	1.2303	0.298337	0.8130,1.8618	1.1023	0.3697	0.8919,1.3623	1.055	0.597719	0.8614,1.2922	0.7366	0.369114	0.4138,1.3113	0.7583	0.397297	0.4440,1.2949
	Anti-sense	0.9628	0.922391	0.6525,1.4206	1.0436	0.782681	0.7328,1.4863	0.8154	0.116385	0.6371,1.0437	0.9503	0.701735	0.7637,1.1826	0.7301	0.236159	0.4492,1.1867	1.378	0.0838848	0.9752,1.9471	0.9836	1	0.7010,1.3799	0.9109	0.62843	0.6552,1.2664	1.3567	0.218652	0.8524,2.1593	1.1885	0.442056	0.7472,1.8907	1.4483	0.122007	0.9093,2.3066	0.7137	0.354086	0.3907,1.3036	0.9554	0.744676	0.7696,1.1862	1.0015	0.959297	0.8199,1.2234	0.5525	0.047111	0.3031,1.0069	0.7612	0.322359	0.4680,1.2380
	Intragenic	1.5702	0.113194	0.8951,2.7545	1.0427	0.868015	0.5523,1.9686	0.4156	0.00834123	0.2062,0.8378	1.2988	0.179429	0.8779,1.9214	0.8321	0.836074	0.3411,2.0294	1.351	0.327113	0.6890,2.6493	0.9446	1	0.4437,2.0113	0.8288	0.858558	0.3894,1.7641	1.6217	0.248578	0.6571,4.0024	1.1247	0.783266	0.4123,3.0684	0	0.268482	0.9093,2.3066	1.3655	0.489126	0.4265,4.3716	1.0473	0.822152	0.6810,1.6106	0.7858	0.342766	0.4957,1.2457	0.6366	0.634022	0.2024,2.0026	1.5554	0.257038	0.7596,3.1849
	Intergenic	0.8655	0.41696	0.6367,1.1766	0.9241	0.627397	0.6977,1.2241	0.8839	0.214605	0.7326,1.0664	0.9907	0.965489	0.8357,1.1744	0.6593	0.0288176	0.4507,0.9644	1.3353	0.0393519	1.0246,1.7402	1.0708	0.587893	0.8271,1.3863	0.9969	1	0.7762,1.2804	1.1046	0.614932	0.7580,1.6098	1.1462	0.448708	0.8084,1.6251	1.3199	0.120936	0.9433,1.8469	0.9867	1	0.6894,1.4121	1.0117	0.893999	0.8506,1.2034	1.0824	0.336085	0.9224,1.2702	0.6203	0.033451	0.3964,0.9707	0.7442	0.140186	0.5050,1.0966
SLE_GSE20864_PBMC	All	0	1	0.5509,1.0384	1.0956	0.685172	0.6590,1.8217	0	0.598749	0.8033,1.1464	0.8631	0.492358	0.6060,1.2292	10.2331	0.0287695	1.8726,55.9203	1.5402	0.099662	0.9510,2.4945	7.0415	0.0551837	1.2889,38.4699	0.9924	1	0.6055,1.6266	0	1	0.5067,1.1939	1.0774	0.850428	0.5311,2.1857	0	1	0.3621,0.9293	0.8789	1	0.4135,1.8682	2.3929	0.278225	0.4382,13.0686	1.0664	0.679404	0.7762,1.4651	5.4618	0.194243	0.6375,46.7945	0.319	0.039421	0.1020,0.9974
	Sense	0	1	0.5509,1.0384	1.5539	0.142528	0.8671,2.7848	0	1	0.8033,1.1464	1.068	0.735048	0.6945,1.6422	7.6101	0.144308	0.8879,65.2229	1.3783	0.319357	0.7059,2.6913	6.2423	0.172558	0.7285,53.4880	0.4887	0.202822	0.1816,1.3153	0	1	0.5067,1.1939	1.548	0.295869	0.6850,3.4981	0	1	0.3621,0.9293	0.8567	1	0.3178,2.3092	1.9266	0.447202	0.2250,16.4973	1.2703	0.237211	0.8663,1.8627	0	1	0.6375,46.7945	0.4599	0.454977	0.1140,1.8542
	Anti-sense	0	1	0.5509,1.0384	0.5262	0.260355	0.1955,1.4164	0	1	0.8033,1.1464	0.74	0.266535	0.4517,1.2122	20.6476	0.00790238	3.7753,112.9256	2.3915	0.00563024	1.3879,4.1209	12.7467	0.0193555	2.3321,69.6706	1.3547	0.253101	0.7729,2.3744	0	1	0.5067,1.1939	0.5203	0.597109	0.1290,2.0986	0	1	0.3621,0.9293	1.1223	0.784789	0.4159,3.0285	1.7776	0.472641	0.2076,15.2210	0.9531	0.917403	0.6298,1.4423	9.7675	0.114688	1.1393,83.7408	0.1883	0.0696073	0.0264,1.3444
	Intragenic	0	1	0.5509,1.0384	0.8823	1	0.2182,3.5669	0	1	0.8033,1.1464	0.7992	0.822008	0.2966,2.1537	32.3794	0.036472	3.7634,278.5878	2.5712	0.0763123	0.9469,6.9823	65.4884	0.00085536	11.9316,359.4424	1.0141	0.725561	0.2506,4.1033	0	1	0.5067,1.1939	0	1	0.1290,2.0986	0	1	0.3621,0.9293	0	1	0.4159,3.0285	22.5267	0.00670264	4.1182,123.2207	1.443	0.280785	0.7105,2.9306	0	1	1.1393,83.7408	0	0.639239	0.0264,1.3444
	Intergenic	0	1	0.5509,1.0384	1.2082	0.478869	0.7265,2.0093	0	0.60096	0.8033,1.1464	0.8662	0.482658	0.6030,1.2443	4.4771	0.230799	0.5226,38.3524	1.5862	0.0858124	0.9667,2.6028	3.0157	0.31986	0.3521,25.8274	0.9298	0.897101	0.5508,1.5698	0	1	0.5067,1.1939	1.1407	0.698438	0.5622,2.3146	0	1	0.3621,0.9293	0.9147	1	0.4302,1.9446	0	0.598283	4.1182,123.2207	1.0653	0.671831	0.7690,1.4759	5.957	0.179899	0.6952,51.0416	0.348	0.0523269	0.1113,1.0882
SLE_GSE24706_pbmcANA	All	0	1	0.5509,1.0384	1.3258	0.467247	0.5763,3.0498	0	1	0.8033,1.1464	1.0189	0.879623	0.5624,1.8457	0	1	0.5226,38.3524	3.2302	0.00132029	1.7065,6.1144	0	1	0.3521,25.8274	1.7624	0.113612	0.8800,3.5297	0	1	0.5067,1.1939	0.8514	1	0.2089,3.4702	0	1	0.3621,0.9293	1.6418	0.317641	0.5996,4.4961	0	1	4.1182,123.2207	1.0877	0.768406	0.6204,1.9070	0	1	0.6952,51.0416	0.3404	0.373368	0.0473,2.4490
	Sense	0	1	0.5509,1.0384	1.6496	0.316132	0.6024,4.5175	0	1	0.8033,1.1464	1.3645	0.417824	0.6815,2.7320	0	1	0.5226,38.3524	2.5107	0.0571399	1.0127,6.2243	0	1	0.3521,25.8274	2.0574	0.107626	0.8303,5.0979	0	1	0.5067,1.1939	1.6409	0.349984	0.4020,6.6980	0	1	0.3621,0.9293	0.6803	1	0.0945,4.8984	0	1	4.1182,123.2207	1.678	0.122449	0.9078,3.1017	0	1	0.6952,51.0416	0.7389	1	0.1026,5.3211
	Anti-sense	0	1	0.5509,1.0384	0.8493	1	0.2084,3.4615	0	1	0.8033,1.1464	0.6912	0.553499	0.2794,1.7101	0	1	0.5226,38.3524	3.9256	0.00311692	1.8016,8.5537	0	1	0.3521,25.8274	1.6775	0.23582	0.6773,4.1548	0	1	0.5067,1.1939	0	0.635576	0.4020,6.6980	0	1	0.3621,0.9293	2.7512	0.102555	0.8646,8.7538	0	1	4.1182,123.2207	0.4609	0.140308	0.1686,1.2602	0	1	0.6952,51.0416	0	0.415386	0.1026,5.3211
	Intragenic	0	1	0.5509,1.0384	1.4148	0.510486	0.1961,10.2078	0	1	0.8033,1.1464	0.6349	1	0.0882,4.5707	0	1	0.5226,38.3524	6.2826	0.0138756	1.9640,20.0974	0	1	0.3521,25.8274	1.6253	0.463427	0.2251,11.7331	0	1	0.5067,1.1939	0	1	0.4020,6.6980	0	1	0.3621,0.9293	0	1	0.8646,8.7538	0	1	4.1182,123.2207	0.5607	1	0.0779,4.0362	0	1	0.6952,51.0416	0	1	0.1026,5.3211
	Intergenic	0	1	0.5509,1.0384	1.2006	0.614029	0.4850,2.9722	0	1	0.8033,1.1464	1.0926	0.754491	0.6031,1.9793	0	1	0.5226,38.3524	3.5384	0.00065456	1.8689,6.6991	0	1	0.3521,25.8274	1.8886	0.098979	0.9429,3.7828	0	1	0.5067,1.1939	0.9011	1	0.2211,3.6729	0	1	0.3621,0.9293	1.7085	0.305724	0.6238,4.6789	0	1	4.1182,123.2207	1.0823	0.762818	0.6079,1.9269	0	1	0.6952,51.0416	0.3713	0.525276	0.0516,2.6713
SLE_GSE61635_pbmcRNP	All	0.7682	0.259003	0.5086,1.1603	0.9205	0.618015	0.6892,1.2293	0.9275	0.591497	0.7299,1.1787	0.805	0.0263082	0.6651,0.9743	0.7021	0.149413	0.4374,1.1269	1.0698	0.638086	0.7937,1.4420	0.6513	0.0437828	0.4314,0.9833	0.7784	0.0965367	0.5832,1.0390	0.8288	0.603321	0.4760,1.4433	0.8711	0.620833	0.5773,1.3143	0.6529	0.205443	0.3580,1.1908	0.3628	0.00016294	0.1994,0.6599	0.8687	0.27434	0.6861,1.0999	0.748	0.00219128	0.6196,0.9029	0.6701	0.193318	0.3851,1.1661	0.7024	0.106175	0.4661,1.0587
	Sense	0.656	0.204847	0.3597,1.1965	1.1127	0.563843	0.7770,1.5935	0.872	0.479948	0.6302,1.2067	0.8665	0.283291	0.6768,1.1094	0.641	0.215454	0.3303,1.2438	0.6875	0.142685	0.4231,1.1170	0.6452	0.16794	0.3538,1.1767	0.6652	0.0853248	0.4249,1.0413	0.7245	0.591919	0.3222,1.6291	0.8974	0.892137	0.5148,1.5645	0.8178	0.742673	0.4046,1.6530	0.3974	0.0086118	0.1880,0.8403	0.6851	0.0303372	0.4874,0.9630	0.7746	0.0413833	0.6062,0.9899	0.6616	0.395142	0.2944,1.4870	0.6234	0.154779	0.3321,1.1702
	Anti-sense	0.8932	0.79525	0.5229,1.5255	0.7549	0.236353	0.4870,1.1700	1.0286	0.816987	0.7625,1.3875	0.8214	0.126988	0.6406,1.0533	0.6952	0.388232	0.3581,1.3496	1.4125	0.0806712	0.9792,2.0375	0.6744	0.170232	0.3953,1.1508	0.8867	0.60256	0.6199,1.2682	1.0079	0.857538	0.4980,2.0396	0.7803	0.493584	0.4272,1.4252	0.5274	0.261651	0.1962,1.4176	0.2948	0.00648194	0.1099,0.7911	1.0309	0.828617	0.7796,1.3632	0.7468	0.0158087	0.5871,0.9498	0.7309	0.53261	0.3618,1.4764	0.779	0.409188	0.4645,1.3063
	Intragenic	1.7265	0.152009	0.8492,3.5100	1.3437	0.370727	0.7316,2.4679	0.9604	1	0.5108,1.8057	1.889	0.0010787	1.3205,2.7022	0.8994	1	0.2863,2.8252	3.1509	8.519e-05	1.9027,5.2178	0.4786	0.449143	0.1186,1.9311	1.2559	0.447274	0.6424,2.4554	2.3425	0.0998807	0.8571,6.4023	2.0139	0.132344	0.8783,4.6179	0	0.630224	0.1962,1.4176	0	0.267163	0.1099,0.7911	1.2928	0.297695	0.7690,2.1735	1.8226	0.00135835	1.2934,2.5683	0.3805	0.52637	0.0531,2.7256	2.3058	0.0259251	1.2073,4.4038
	Intergenic	0.6621	0.0779377	0.4176,1.0497	0.8853	0.502396	0.6512,1.2037	0.9368	0.668888	0.7333,1.1966	0.7759	0.0121065	0.6362,0.9463	0.6359	0.0855126	0.3794,1.0659	0.9862	1	0.7147,1.3608	0.6983	0.0873569	0.4625,1.0545	0.7634	0.0866738	0.5654,1.0307	0.8077	0.592316	0.4537,1.4378	0.8021	0.362146	0.5173,1.2435	0.6796	0.246898	0.3726,1.2397	0.3776	0.00028294	0.2076,0.6870	0.874	0.288394	0.6861,1.1134	0.687	0.00013454	0.5626,0.8389	0.6734	0.218363	0.3785,1.1979	0.5682	0.0150221	0.3547,0.9101
SLE_GSE52471_DLEskin	All	0.8284	0.220312	0.6207,1.1056	0.9182	0.624397	0.6913,1.2196	1.0698	0.436217	0.9061,1.2629	0.9926	0.964591	0.8336,1.1818	0.8968	0.549277	0.6597,1.2191	0.9287	0.701001	0.6807,1.2671	0.537	4.715e-05	0.3886,0.7420	0.9078	0.515252	0.6962,1.1836	0.6833	0.089718	0.4410,1.0585	1.0192	0.922758	0.6997,1.4845	0.8333	0.41032	0.5652,1.2286	0.712	0.132407	0.4641,1.0924	0.7911	0.00854835	0.6633,0.9436	1.0101	0.897769	0.8544,1.1942	0.7739	0.19973	0.5321,1.1255	0.9115	0.725219	0.6372,1.3039
	Sense	0.9033	0.713494	0.6206,1.3149	0.7497	0.220006	0.4930,1.1400	0.8775	0.305741	0.6940,1.1095	0.9877	0.95348	0.7847,1.2431	0.5452	0.0162315	0.3257,0.9126	0.9037	0.757964	0.5937,1.3758	0.5072	0.00345781	0.3126,0.8230	0.942	0.851769	0.6470,1.3715	0.6815	0.245826	0.3734,1.2441	0.7905	0.508174	0.4438,1.4081	0.6253	0.122068	0.3515,1.1122	0.6626	0.180128	0.3724,1.1787	0.7608	0.023058	0.6012,0.9630	1.1653	0.148862	0.9488,1.4313	0.7395	0.324605	0.4246,1.2877	1.1678	0.52459	0.7347,1.8562
	Anti-sense	0.8534	0.509397	0.5746,1.2675	1.0917	0.628312	0.7582,1.5720	1.2509	0.0331217	1.0221,1.5310	1.0039	0.954136	0.8015,1.2573	1.2297	0.254787	0.8482,1.7828	0.9819	1	0.6446,1.4955	0.6161	0.0160813	0.4123,0.9205	0.9621	0.932223	0.6858,1.3497	0.772	0.433717	0.4334,1.3753	1.1795	0.499544	0.7230,1.9244	1.1875	0.497672	0.7276,1.9383	0.7966	0.578152	0.4360,1.4556	0.8974	0.346306	0.7249,1.1111	0.9789	0.914403	0.7917,1.2104	0.8021	0.431557	0.4930,1.3048	0.7978	0.486977	0.4834,1.3168
	Intragenic	1.3318	0.308741	0.7433,2.3862	1.0419	0.861267	0.5339,2.0329	1.3147	0.169044	0.8823,1.9588	0.9425	0.90636	0.5867,1.5142	1.9379	0.0395486	1.0749,3.4940	1.1563	0.676075	0.5415,2.4691	0.3657	0.0701587	0.1168,1.1447	0.6529	0.455797	0.2684,1.5884	0.578	0.777722	0.1422,2.3498	1.5876	0.257647	0.6433,3.9178	1.4378	0.471726	0.4491,4.6037	0.996	1	0.2427,4.0873	1.2024	0.330968	0.8135,1.7772	1.1742	0.435872	0.7830,1.7610	1.8593	0.102022	0.9431,3.6654	1.279	0.480752	0.5629,2.9063
	Intergenic	0.8169	0.201228	0.6031,1.1064	0.9091	0.609092	0.6750,1.2244	1.0848	0.352076	0.9159,1.2848	1.0165	0.85559	0.8513,1.2138	0.9125	0.639865	0.6641,1.2537	0.9685	0.936148	0.7047,1.3312	0.5762	0.00040271	0.4169,0.7963	0.9569	0.788779	0.7322,1.2505	0.688	0.120295	0.4394,1.0773	1.0014	1	0.6785,1.4779	0.834	0.402884	0.5616,1.2386	0.6711	0.0845895	0.4287,1.0505	0.7563	0.0026861	0.6291,0.9092	1.0097	0.895096	0.8502,1.1990	0.7233	0.129646	0.4838,1.0816	0.9638	0.927234	0.6698,1.3867
SLEinactive_GSE30153_B	All	0	1	0.4176,1.0497	1.5415	0.341965	0.5527,4.2998	1.7766	0.497385	0.1847,17.0836	1.4413	0.314905	0.7162,2.9004	0	1	0.3794,1.0659	1.3944	0.482182	0.4324,4.4966	4.6921	0.240165	0.4878,45.1307	1.3095	0.552171	0.4696,3.6521	0	1	0.4537,1.4378	0	0.647167	0.5173,1.2435	0	1	0.3726,1.2397	2.155	0.174929	0.6679,6.9538	0	1	0.6861,1.1134	0.9815	1	0.4584,2.1014	9.1036	0.134092	0.9461,87.5979	0.5928	1	0.0817,4.3028
	Sense	0	1	0.4176,1.0497	0.6887	1	0.0949,5.0000	0	1	0.1847,17.0836	1.2989	0.593217	0.5134,3.2860	0	1	0.3794,1.0659	1.691	0.340169	0.4094,6.9841	0	1	0.4878,45.1307	1.3867	0.657972	0.3359,5.7255	0	1	0.4537,1.4378	0	1	0.5173,1.2435	0	1	0.3726,1.2397	2.4266	0.207718	0.5871,10.0298	0	1	0.6861,1.1134	1.1469	0.800238	0.4534,2.9012	0	1	0.9461,87.5979	0	1	0.0817,4.3028
	Anti-sense	0	1	0.4176,1.0497	2.293	0.154497	0.7105,7.3998	3.5063	0.304682	0.3646,33.7216	1.8426	0.123483	0.8246,4.1176	0	1	0.3794,1.0659	2.8157	0.100139	0.8721,9.0908	8.4903	0.142874	0.8824,81.6915	1.1314	0.698138	0.2741,4.6698	0	1	0.4537,1.4378	0	1	0.5173,1.2435	0	1	0.3726,1.2397	1.5489	0.481177	0.2131,11.2596	0	1	0.6861,1.1134	1.058	0.809456	0.4183,2.6764	16.2803	0.0779975	1.6908,156.7548	1.0601	0.615155	0.1459,7.7007
	Intragenic	0	1	0.4176,1.0497	0	1	0.7105,7.3998	0	1	0.3646,33.7216	2.2642	0.229553	0.5479,9.3572	0	1	0.3794,1.0659	0	1	0.8721,9.0908	43.4593	0.0302352	4.5027,419.4630	0	1	0.2741,4.6698	0	1	0.4537,1.4378	0	1	0.5173,1.2435	0	1	0.3726,1.2397	0	1	0.2131,11.2596	0	1	0.6861,1.1134	0.9764	1	0.1344,7.0913	0	1	1.6908,156.7548	0	1	0.1459,7.7007
	Intergenic	0	1	0.4176,1.0497	1.6986	0.308146	0.6089,4.7384	1.9048	0.475428	0.1981,18.3167	1.354	0.410815	0.6542,2.8021	0	1	0.3794,1.0659	1.5266	0.454157	0.4734,4.9234	5.0265	0.226602	0.5226,48.3492	1.403	0.536038	0.5030,3.9131	0	1	0.4537,1.4378	0	0.640704	0.5173,1.2435	0	1	0.3726,1.2397	2.2424	0.161617	0.6949,7.2362	0	1	0.6861,1.1134	0.9061	1	0.4056,2.0238	9.9291	0.123846	1.0318,95.5480	0.6465	1	0.0891,4.6934
LN_GSE32591_glomolular	All	0.811	0.834505	0.3300,1.9932	1.2658	0.33904	0.7818,2.0495	0.8016	0.50797	0.4566,1.4073	0.9664	0.931137	0.6861,1.3613	1.0019	1	0.4076,2.4629	1.7583	0.0232964	1.1100,2.7851	0.2672	0.0487387	0.0659,1.0835	1.8262	0.00481422	1.2370,2.6960	0.3166	0.378661	0.0441,2.2711	0.8126	0.849449	0.3605,1.8318	0.6	0.775391	0.1479,2.4349	1.0262	0.854905	0.5059,2.0819	0.7795	0.442296	0.4512,1.3464	0.9475	0.802891	0.6795,1.3212	1.3393	0.432072	0.5445,3.2940	1.3573	0.302088	0.7576,2.4317
	Sense	0.9141	1	0.2895,2.8863	1.4405	0.26649	0.7843,2.6457	0.7627	0.601465	0.3540,1.6430	0.9827	1	0.6275,1.5390	0.7232	1	0.1782,2.9355	1.0778	0.840228	0.5067,2.2928	0.593	0.776202	0.1461,2.4064	1.8321	0.0419208	1.0643,3.1536	0	0.416288	0.0441,2.2711	1.0355	0.796909	0.3838,2.7934	1.0377	0.719508	0.2554,4.2157	1.0948	0.809912	0.4497,2.6649	0.8841	0.868394	0.4462,1.7518	1.0519	0.828697	0.6948,1.5926	2.3083	0.103324	0.8466,6.2934	1.1898	0.618641	0.4886,2.8974
	Anti-sense	0.968	1	0.3065,3.0568	1.0923	0.707323	0.5383,2.2164	0.9656	1	0.4873,1.9135	1.0982	0.653834	0.7198,1.6756	1.1887	0.743038	0.3763,3.7555	2.6204	0.00117162	1.5464,4.4403	0	0.0362642	0.1461,2.4064	2.0766	0.00443828	1.2960,3.3276	0.6301	1	0.0877,4.5257	0.5286	0.595232	0.1310,2.1324	0.6707	1	0.0934,4.8179	0.8497	1	0.2710,2.6639	0.7173	0.425124	0.3487,1.4758	0.8839	0.675507	0.5748,1.3592	0.4591	0.727792	0.0640,3.2950	1.594	0.176692	0.7844,3.2391
	Intragenic	3.2886	0.0681339	1.0365,10.4341	0.4446	0.730472	0.0621,3.1813	0.4787	0.72655	0.0667,3.4361	1.8821	0.065986	0.9625,3.6804	1.5219	0.485086	0.2112,10.9657	3.2983	0.0209949	1.3437,8.0962	1.2255	0.560783	0.1703,8.8207	2.644	0.0461217	1.0798,6.4740	0	1	0.0877,4.5257	0	1	0.1310,2.1324	0	1	0.0934,4.8179	1.9556	0.40519	0.2697,14.1781	0.8551	1	0.2106,3.4720	1.6595	0.12943	0.8491,3.2431	0	1	0.0640,3.2950	0.8173	1	0.1139,5.8672
	Intergenic	0.5252	0.379734	0.1665,1.6570	1.396	0.198206	0.8619,2.2608	0.7895	0.497314	0.4417,1.4114	0.9431	0.859363	0.6618,1.3438	1.097	0.80836	0.4462,2.6972	1.6132	0.0612323	0.9829,2.6478	0.2863	0.0680629	0.0706,1.1609	1.805	0.00592341	1.2076,2.6980	0.335	0.375381	0.0467,2.4035	0.8603	1	0.3816,1.9395	0.6243	0.773359	0.1538,2.5336	0.9296	1	0.4372,1.9767	0.7789	0.432218	0.4437,1.3673	0.9103	0.668721	0.6439,1.2869	1.4612	0.401997	0.5940,3.5946	1.4819	0.20822	0.8269,2.6557
LN_GSE32591_tubulolar	All	0.6897	1	0.0932,5.1015	1.0035	1	0.4395,2.2912	0.7265	0.786958	0.2174,2.4284	1.0296	0.893408	0.6120,1.7323	1.7784	0.326518	0.4188,7.5512	1.6898	0.157913	0.8200,3.4823	0	0.408234	0.0706,1.1609	1.995	0.0278553	1.1141,3.5726	0	1	0.0467,2.4035	0.9895	1	0.3132,3.1258	1.3149	0.5418	0.1777,9.7310	0.9277	1	0.2937,2.9301	0.6523	0.605681	0.1951,2.1801	0.8597	0.69789	0.5045,1.4652	1.1371	0.593509	0.1537,8.4138	0.5289	0.591651	0.1303,2.1464
	Sense	1.3211	0.540139	0.1785,9.7771	1.5883	0.256993	0.6453,3.9094	1.4877	0.462825	0.4449,4.9741	0.7783	0.722887	0.3611,1.6775	1.5844	0.477731	0.2140,11.7276	1.5079	0.348174	0.5537,4.1069	0	1	0.0706,1.1609	2.237	0.0454628	1.0360,4.8303	0	1	0.0467,2.4035	1.9092	0.215176	0.6033,6.0420	2.2722	0.365537	0.3068,16.8282	1.0579	0.714534	0.2604,4.2990	1.3137	0.506635	0.3929,4.3921	1.0139	0.867962	0.5278,1.9476	2.4678	0.342474	0.3332,18.2803	0	0.425582	0.1303,2.1464
	Anti-sense	0	1	0.1785,9.7771	0.3219	0.377087	0.0449,2.3095	0.4379	0.719898	0.0592,3.2386	1.4885	0.166413	0.8316,2.6644	1.7169	0.451247	0.2319,12.7097	2.9617	0.0125936	1.3704,6.4006	0	1	0.0706,1.1609	2.3976	0.0180885	1.2074,4.7610	0	1	0.0467,2.4035	0	0.411785	0.6033,6.0420	0	1	0.3068,16.8282	0.6837	1	0.0952,4.9117	0	0.171099	0.3929,4.3921	1.0401	0.870936	0.5563,1.9446	0	1	0.3332,18.2803	0.9466	1	0.2330,3.8456
	Intragenic	0	1	0.1785,9.7771	1.0874	0.60402	0.1511,7.8235	0	1	0.0592,3.2386	1.4981	0.459127	0.4738,4.7371	0	1	0.2319,12.7097	1.5513	0.478646	0.2153,11.1794	0	1	0.0706,1.1609	1.2492	0.553964	0.1735,8.9925	0	1	0.0467,2.4035	0	1	0.6033,6.0420	0	1	0.3068,16.8282	0	1	0.0952,4.9117	0	1	0.3929,4.3921	0.8717	1	0.2146,3.5406	0	1	0.3332,18.2803	0	1	0.2330,3.8456
	Intergenic	0.7598	1	0.1027,5.6205	1.1059	0.823619	0.4843,2.5253	0.779	1	0.2330,2.6038	1.1042	0.68074	0.6563,1.8578	1.9469	0.290373	0.4585,8.2672	1.8506	0.0911523	0.8979,3.8144	0	0.401879	0.0706,1.1609	2.1382	0.0145606	1.1939,3.8294	0	1	0.0467,2.4035	1.0473	0.764821	0.3315,3.3087	1.3681	0.527919	0.1849,10.1249	0.9653	1	0.3056,3.0490	0.7059	0.786948	0.2112,2.3596	0.9307	0.894648	0.5461,1.5862	1.2402	0.562486	0.1676,9.1775	0.5769	0.778406	0.1421,2.3415
RA_GSE1919_SynovialTissues	All	0.6971	0.131619	0.4393,1.1063	1.0743	0.673629	0.7802,1.4793	1.0009	1	0.7792,1.2857	0.938	0.59315	0.7573,1.1617	1.2063	0.374969	0.8091,1.7985	0.951	0.85365	0.6567,1.3772	0.6572	0.0607742	0.4232,1.0206	0.8853	0.530533	0.6409,1.2228	0.7313	0.403017	0.3894,1.3737	0.7615	0.351447	0.4543,1.2764	0.6147	0.175347	0.3167,1.1930	1.1177	0.571838	0.7334,1.7035	0.7	0.00950952	0.5329,0.9195	0.9734	0.836687	0.7940,1.1934	0.7147	0.311257	0.4015,1.2722	0.6581	0.11225	0.3992,1.0849
	Sense	0.9042	0.891905	0.5188,1.5759	1.1752	0.427196	0.7775,1.7763	0.9912	1	0.7123,1.3795	0.9292	0.673228	0.6997,1.2339	1.4429	0.139272	0.8840,2.3550	0.983	1	0.6039,1.6001	0.7474	0.419506	0.4094,1.3643	0.5593	0.0426602	0.3147,0.9937	0.6952	0.566306	0.2865,1.6868	0.6737	0.422647	0.3180,1.4274	0.704	0.485083	0.3131,1.5827	1.1598	0.556398	0.6781,1.9837	0.7514	0.128536	0.5288,1.0677	1.2118	0.124406	0.9500,1.5459	1.163	0.58388	0.5975,2.2638	0.6151	0.282237	0.2905,1.3026
	Anti-sense	0.5796	0.161524	0.2871,1.1700	0.8656	0.64222	0.5321,1.4081	1.0374	0.803835	0.7535,1.4282	0.9899	1	0.7538,1.2998	0.8976	0.878252	0.4775,1.6874	0.8708	0.701408	0.5100,1.4868	0.5515	0.0654569	0.2939,1.0350	1.1482	0.47326	0.7875,1.6743	0.719	0.695759	0.2963,1.7448	0.7996	0.744463	0.3956,1.6165	0.6097	0.424972	0.2267,1.6397	0.9626	1	0.4948,1.8724	0.7149	0.0630148	0.5055,1.0110	0.7226	0.0276601	0.5417,0.9638	0.4163	0.0928744	0.1550,1.1177	0.7296	0.403597	0.3886,1.3700
	Intragenic	0.9742	1	0.3612,2.6275	1.1918	0.53395	0.5600,2.5365	0.7691	0.611586	0.3628,1.6301	0.9999	1	0.5737,1.7427	1.7603	0.218185	0.7200,4.3038	1.4619	0.315783	0.6453,3.3119	1.1211	0.784839	0.4152,3.0274	0.9694	1	0.3980,2.3607	0	0.410647	0.2963,1.7448	0.4481	0.728554	0.0624,3.2202	0	1	0.2267,1.6397	2.2586	0.157564	0.7048,7.2377	0.6784	0.421729	0.3202,1.4371	1.1667	0.503395	0.7161,1.9010	0.8873	1	0.2190,3.5951	0.9244	1	0.2936,2.9099
	Intergenic	0.6839	0.140784	0.4202,1.1131	1.0299	0.860386	0.7331,1.4468	1.005	0.947848	0.7779,1.2984	0.9715	0.826808	0.7822,1.2065	1.2135	0.355574	0.8014,1.8373	0.9689	1	0.6608,1.4208	0.6339	0.0529901	0.3995,1.0058	0.8984	0.572579	0.6453,1.2508	0.7744	0.565422	0.4122,1.4550	0.8066	0.474024	0.4811,1.3525	0.6397	0.215161	0.3296,1.2419	1.057	0.730732	0.6807,1.6413	0.7291	0.0265254	0.5528,0.9617	0.9326	0.56045	0.7543,1.1531	0.6459	0.189589	0.3440,1.2128	0.672	0.151757	0.4011,1.1259
RA_GSE4588_B	All	0.8982	0.500144	0.6815,1.1838	0.8792	0.437351	0.6566,1.1771	0.8415	0.0594688	0.7046,1.0050	0.8141	0.0313801	0.6744,0.9826	0.7491	0.0882441	0.5393,1.0404	1.5474	0.00140099	1.1997,1.9959	0.6115	0.00085157	0.4520,0.8273	0.843	0.23742	0.6396,1.1112	0.6351	0.0492732	0.4058,0.9940	0.7765	0.282295	0.5059,1.1919	0.783	0.276337	0.5275,1.1625	0.7616	0.218573	0.5008,1.1582	0.8536	0.0691924	0.7200,1.0119	0.9311	0.436562	0.7830,1.1073	0.8123	0.309354	0.5651,1.1677	0.6264	0.0328826	0.4085,0.9605
	Sense	0.8834	0.586209	0.6070,1.2858	0.9066	0.703945	0.6147,1.3373	0.7963	0.0632695	0.6255,1.0138	0.7526	0.0291576	0.5810,0.9750	0.5334	0.01304	0.3187,0.8927	1.4022	0.0621477	0.9878,1.9905	0.7111	0.105343	0.4717,1.0718	0.787	0.299006	0.5219,1.1868	0.4187	0.0147293	0.1979,0.8858	0.737	0.420755	0.4036,1.3457	0.7179	0.288795	0.4206,1.2254	0.9128	0.806507	0.5525,1.5079	0.8852	0.309153	0.7106,1.1027	0.7796	0.0436075	0.6120,0.9930	0.7815	0.462153	0.4576,1.3348	0.6723	0.247543	0.3685,1.2268
	Anti-sense	0.9372	0.851929	0.6437,1.3646	0.8116	0.379629	0.5335,1.2346	0.8611	0.222227	0.6839,1.0842	0.8145	0.104158	0.6363,1.0425	0.9057	0.757692	0.5949,1.3790	1.6238	0.00933119	1.1535,2.2860	0.5522	0.0031159	0.3636,0.8385	0.9532	0.863858	0.6764,1.3433	0.8872	0.795022	0.5189,1.5169	0.7626	0.49537	0.4176,1.3928	0.8756	0.788628	0.5020,1.5270	0.5848	0.159719	0.2895,1.1812	0.8763	0.233855	0.7079,1.0847	1.0247	0.828207	0.8300,1.2649	0.8818	0.737718	0.5559,1.3989	0.6038	0.100971	0.3396,1.0734
	Intragenic	1.4188	0.236536	0.8091,2.4881	0.8184	0.726944	0.3850,1.7398	1.18	0.425479	0.7802,1.7848	0.9059	0.811788	0.5566,1.4746	1.5578	0.162049	0.8205,2.9578	2.0957	0.0195949	1.1621,3.7794	0.3578	0.0705545	0.1143,1.1200	1.0847	0.708766	0.5338,2.2040	0.5656	0.587543	0.1391,2.2992	1.2801	0.560015	0.4691,3.4929	1.4069	0.47881	0.4394,4.5045	1.0163	1	0.2476,4.1707	1.083	0.668337	0.7224,1.6236	1.0967	0.653257	0.7195,1.6717	0.9761	1	0.3988,2.3891	1.0783	0.810938	0.4405,2.6397
	Intergenic	0.934	0.724762	0.7032,1.2404	0.8858	0.506844	0.6537,1.2003	0.7808	0.00847738	0.6476,0.9414	0.8109	0.0345109	0.6683,0.9838	0.7074	0.0533932	0.4978,1.0054	1.5594	0.00157159	1.1976,2.0304	0.6563	0.00530833	0.4850,0.8881	0.8513	0.309365	0.6411,1.1305	0.6379	0.0547543	0.4029,1.0098	0.7445	0.227944	0.4754,1.1662	0.7826	0.267946	0.5231,1.1707	0.7209	0.175166	0.4652,1.1171	0.8711	0.126821	0.7321,1.0364	0.9248	0.424144	0.7737,1.1054	0.8276	0.37786	0.5688,1.2041	0.6196	0.0334764	0.3960,0.9696
RA_GSE4588_CD4	All	0.8513	0.297251	0.6360,1.1396	0.8537	0.479169	0.5894,1.2365	0.9804	0.859704	0.8235,1.1671	0.7199	0.0082592	0.5626,0.9212	0.6477	0.0174456	0.4510,0.9301	0.6881	0.119272	0.4392,1.0782	0.72	0.0273563	0.5382,0.9632	0.7492	0.138065	0.5204,1.0786	0.4702	0.00269272	0.2761,0.8005	1.0235	0.902413	0.6370,1.6444	1.1185	0.512707	0.7891,1.5853	0.7918	0.475212	0.4722,1.3277	0.7358	0.00087217	0.6117,0.8850	0.6967	0.00241084	0.5483,0.8854	0.8121	0.335932	0.5582,1.1814	0.5889	0.0588866	0.3387,1.0239
	Sense	0.8441	0.453885	0.5684,1.2536	0.8511	0.63388	0.5156,1.4049	1.0034	0.953672	0.7993,1.2598	0.7406	0.0761904	0.5340,1.0272	0.3765	0.00067711	0.2011,0.7051	0.6933	0.298009	0.3801,1.2645	0.696	0.113102	0.4537,1.0678	0.6206	0.123325	0.3491,1.1033	0.2537	0.00133977	0.0946,0.6805	0.747	0.613603	0.3524,1.5833	1.2997	0.22414	0.8514,1.9841	0.8124	0.645258	0.4182,1.5783	0.7657	0.0271859	0.6022,0.9736	0.6166	0.00316777	0.4412,0.8619	0.7753	0.448542	0.4452,1.3504	0.4834	0.108894	0.1995,1.1712
	Anti-sense	0.932	0.84717	0.6317,1.3749	0.7847	0.462589	0.4598,1.3392	0.9794	0.908859	0.7811,1.2280	0.855	0.344667	0.6312,1.1580	0.9268	0.832062	0.6031,1.4242	0.6115	0.176387	0.3152,1.1863	0.7835	0.235685	0.5420,1.1327	0.8601	0.591502	0.5485,1.3487	0.6698	0.281739	0.3566,1.2583	1.2345	0.493192	0.6746,2.2591	0.7883	0.579337	0.4314,1.4402	0.7026	0.484925	0.3125,1.5799	0.7261	0.00741858	0.5728,0.9204	0.8427	0.276987	0.6341,1.1199	0.8411	0.565716	0.5170,1.3686	0.643	0.244789	0.3185,1.2981
	Intragenic	0.561	0.228142	0.2309,1.3631	1.519	0.263982	0.7476,3.0863	1.0977	0.638913	0.7064,1.7057	0.7574	0.549534	0.3900,1.4708	1.4918	0.216864	0.7605,2.9261	0.7922	1	0.2523,2.4875	1.4718	0.194888	0.7999,2.7082	1.0744	0.812014	0.4410,2.6173	0.6058	0.774278	0.1490,2.4627	3.1761	0.0148852	1.3832,7.2926	2.6117	0.0517809	1.0417,6.5480	0	0.638001	0.3125,1.5799	0.8686	0.657993	0.5477,1.3774	0.8994	0.88805	0.5050,1.6016	1.2657	0.484661	0.5570,2.8758	0.3353	0.376652	0.0468,2.4012
	Intergenic	0.8785	0.467171	0.6504,1.1866	0.8418	0.459982	0.5703,1.2427	1.0123	0.891953	0.8483,1.2080	0.7363	0.0156713	0.5728,0.9465	0.6142	0.0106088	0.4172,0.9042	0.7543	0.264707	0.4813,1.1823	0.705	0.0229878	0.5207,0.9544	0.7482	0.148973	0.5137,1.0898	0.4614	0.00287339	0.2657,0.8012	0.9581	1	0.5801,1.5824	1.0554	0.774796	0.7331,1.5193	0.8244	0.545718	0.4915,1.3825	0.7282	0.00086684	0.6017,0.8813	0.7214	0.0075825	0.5654,0.9205	0.7589	0.202588	0.5074,1.1350	0.5919	0.0819029	0.3330,1.0521
RA_GSE10500_macophage	All	0.7946	0.159237	0.5866,1.0763	1.0566	0.656178	0.8281,1.3481	0.9667	0.754584	0.8099,1.1538	1.0924	0.258258	0.9364,1.2744	0.8462	0.353729	0.6113,1.1713	1.0369	0.779809	0.7918,1.3580	0.786	0.101592	0.5920,1.0434	0.8371	0.173346	0.6524,1.0741	0.6965	0.119464	0.4448,1.0905	0.6754	0.0639417	0.4481,1.0180	0.965	0.924927	0.6627,1.4051	0.5225	0.00266678	0.3341,0.8171	0.8718	0.13172	0.7309,1.0399	0.9761	0.785146	0.8369,1.1384	0.5622	0.00798768	0.3594,0.8793	0.9612	0.873325	0.6994,1.3211
	Sense	0.724	0.155281	0.4719,1.1110	1.2444	0.170104	0.9166,1.6895	0.9454	0.681205	0.7473,1.1962	1.137	0.202513	0.9324,1.3865	0.8309	0.470563	0.5358,1.2885	1.2888	0.135018	0.9285,1.7888	1.0591	0.707568	0.7398,1.5163	0.5973	0.0134491	0.3932,0.9075	0.5937	0.141702	0.3059,1.1526	0.6977	0.229073	0.4006,1.2154	0.8457	0.624094	0.5040,1.4192	0.4918	0.0144487	0.2699,0.8963	0.904	0.403076	0.7202,1.1347	1.0911	0.363855	0.9009,1.3215	0.4187	0.0148326	0.1980,0.8857	0.7386	0.29888	0.4402,1.2393
	Anti-sense	0.8415	0.495496	0.5578,1.2694	0.9138	0.72478	0.6387,1.3074	0.9237	0.562813	0.7311,1.1670	1.0833	0.432493	0.8878,1.3218	0.9479	0.914695	0.6168,1.4568	0.8323	0.438377	0.5515,1.2560	0.5236	0.0026669	0.3348,0.8187	1.0603	0.699026	0.7892,1.4247	0.7561	0.4187	0.4140,1.3808	0.607	0.111095	0.3326,1.1078	1.1943	0.483867	0.7212,1.9776	0.5258	0.0572879	0.2708,1.0208	0.8656	0.214373	0.6922,1.0825	0.9368	0.557614	0.7699,1.1398	0.6503	0.131911	0.3738,1.1312	1.1254	0.528404	0.7614,1.6636
	Intragenic	1.0541	0.860274	0.5402,2.0570	1.1461	0.633491	0.6399,2.0526	0.7878	0.475709	0.4697,1.3213	1.4617	0.0413678	1.0231,2.0883	0.6547	0.532862	0.2425,1.7680	1.0816	0.708945	0.5309,2.2035	0.2597	0.0374944	0.0644,1.0467	0.9774	1	0.5003,1.9096	1.2692	0.562468	0.4651,3.4631	1.5685	0.291331	0.6844,3.5945	1.0077	1	0.2455,4.1352	0.8105	1	0.1975,3.3251	0.7905	0.433268	0.4861,1.2855	1.3666	0.0851327	0.9668,1.9316	0.6305	0.634676	0.2004,1.9833	1.2237	0.522895	0.5707,2.6237
	Intergenic	0.7734	0.123189	0.5611,1.0659	1.1152	0.388021	0.8695,1.4303	0.9969	1	0.8331,1.1929	1.0891	0.282333	0.9301,1.2754	0.9033	0.628773	0.6497,1.2558	1.0752	0.610013	0.8152,1.4181	0.826	0.200447	0.6205,1.0996	0.8556	0.246623	0.6632,1.1038	0.6995	0.134074	0.4417,1.1078	0.6223	0.0298052	0.4018,0.9639	0.9684	1	0.6608,1.4193	0.5158	0.00293823	0.3261,0.8159	0.8854	0.199622	0.7393,1.0603	0.9386	0.471533	0.7999,1.1014	0.6142	0.0274819	0.3925,0.9611	0.9147	0.677819	0.6521,1.2829
RA_GSE15573_PBMC	All	0	1	0.5611,1.0659	2.6173	0.127076	0.7737,8.8538	0	1	0.8331,1.1929	1.9998	0.143924	0.7821,5.1134	0	1	0.6497,1.2558	0	0.623523	0.8152,1.4181	0	1	0.6205,1.0996	0.6698	1	0.0901,4.9826	0	1	0.4417,1.1078	0	1	0.4018,0.9639	0	1	0.6608,1.4193	4.9951	0.0288082	1.4754,16.9115	0	1	0.7393,1.0603	1.0633	0.783882	0.3597,3.1433	0	1	0.3925,0.9611	0	1	0.6521,1.2829
	Sense	0	1	0.5611,1.0659	0	1	0.7737,8.8538	0	1	0.8331,1.1929	2.4258	0.107818	0.8203,7.1734	0	1	0.6497,1.2558	0	1	0.8152,1.4181	0	1	0.6205,1.0996	1.4854	0.500788	0.1996,11.0554	0	1	0.4417,1.1078	0	1	0.4018,0.9639	0	1	0.6608,1.4193	0	1	1.4754,16.9115	0	1	0.7393,1.0603	1.5213	0.456537	0.4499,5.1443	0	1	0.3925,0.9611	0	1	0.6521,1.2829
	Anti-sense	0	1	0.5611,1.0659	5.3148	0.0246757	1.5697,17.9959	0	1	0.8331,1.1929	1.6612	0.433189	0.4912,5.6176	0	1	0.6497,1.2558	0	1	0.8152,1.4181	0	1	0.6205,1.0996	0	1	0.1996,11.0554	0	1	0.4417,1.1078	0	1	0.4018,0.9639	0	1	0.6608,1.4193	11.3181	0.00334128	3.3356,38.4034	0	1	0.7393,1.0603	1.4036	0.482791	0.4151,4.7460	0	1	0.3925,0.9611	0	1	0.6521,1.2829
	Intragenic	0	1	0.5611,1.0659	0	1	1.5697,17.9959	0	1	0.8331,1.1929	0	1	0.4912,5.6176	0	1	0.6497,1.2558	0	1	0.8152,1.4181	0	1	0.6205,1.0996	0	1	0.1996,11.0554	0	1	0.4417,1.1078	0	1	0.4018,0.9639	0	1	0.6608,1.4193	0	1	3.3356,38.4034	0	1	0.7393,1.0603	2.1406	0.384072	0.2875,15.9395	0	1	0.3925,0.9611	0	1	0.6521,1.2829
	Intergenic	0	1	0.5611,1.0659	2.8837	0.103532	0.8524,9.7560	0	1	0.8331,1.1929	2.1442	0.125967	0.8386,5.4829	0	1	0.6497,1.2558	0	1	0.8152,1.4181	0	1	0.6205,1.0996	0.7176	1	0.0965,5.3380	0	1	0.4417,1.1078	0	1	0.4018,0.9639	0	1	0.6608,1.4193	5.1976	0.0260941	1.5351,17.5981	0	1	0.7393,1.0603	1.1509	0.771919	0.3893,3.4022	0	1	0.3925,0.9611	0	1	0.6521,1.2829
psorisis_GSE13355_skin	All	0.9011	0.740599	0.5729,1.4172	0.8963	0.65129	0.6186,1.2988	1.0769	0.574816	0.8234,1.4085	0.9985	1	0.7973,1.2504	1.1755	0.465188	0.7546,1.8312	0.7599	0.273688	0.4898,1.1789	0.7237	0.182096	0.4553,1.1504	0.7324	0.110023	0.5027,1.0671	0.9841	1	0.5381,1.7996	0.5223	0.0589813	0.2694,1.0127	0.4934	0.0999261	0.2196,1.1082	0.7726	0.396578	0.4527,1.3186	0.8416	0.249884	0.6356,1.1145	1.1539	0.183974	0.9375,1.4203	1.0245	0.889458	0.5986,1.7533	0.7663	0.363456	0.4644,1.2645
	Sense	1.0145	0.881902	0.5687,1.8098	0.7763	0.464071	0.4549,1.3250	1.1904	0.309597	0.8495,1.6682	0.7565	0.112515	0.5430,1.0539	0.8	0.744285	0.3957,1.6177	0.3902	0.0160238	0.1740,0.8751	0.9111	0.883026	0.4984,1.6657	0.539	0.0525064	0.2874,1.0108	0.6727	0.672019	0.2500,1.8098	0.5545	0.23044	0.2288,1.3443	0.4222	0.173164	0.1351,1.3193	0.7541	0.529526	0.3732,1.5235	0.9571	0.861138	0.6747,1.3577	1.4116	0.00788619	1.1025,1.8074	1.4163	0.31058	0.7266,2.7606	0.82	0.7425	0.4057,1.6574
	Anti-sense	0.7056	0.442698	0.3491,1.4261	1.0082	0.900801	0.6192,1.6416	1.1134	0.524408	0.7914,1.5663	1.2346	0.136574	0.9439,1.6149	1.5571	0.12553	0.9082,2.6697	1.2429	0.406577	0.7625,2.0260	0.6026	0.140703	0.3103,1.1705	0.95	0.91273	0.6119,1.4750	1.6055	0.194298	0.8231,3.1320	0.5735	0.293669	0.2366,1.3906	0.5527	0.385015	0.1767,1.7289	0.8627	0.858055	0.4067,1.8299	0.8822	0.552126	0.6220,1.2513	1.0588	0.676937	0.8114,1.3817	0.635	0.46144	0.2618,1.5405	0.7608	0.548998	0.3918,1.4774
	Intragenic	0.584	0.77914	0.1447,2.3566	0.3842	0.254216	0.0953,1.5487	1.4973	0.18882	0.8172,2.7436	0.5235	0.126844	0.2332,1.1753	3.5128	0.00289169	1.7159,7.1913	1.1149	0.785385	0.4123,3.0148	0.6712	1	0.1662,2.7110	0.2194	0.140989	0.0307,1.5676	2.4337	0.132866	0.7670,7.7223	0	0.269257	0.2366,1.3906	0	1	0.1767,1.7289	1.7134	0.333026	0.4171,7.0382	1.0704	0.727253	0.5500,2.0833	1.3589	0.198104	0.8332,2.2162	0	0.269772	0.2618,1.5405	1.4439	0.366342	0.5322,3.9171
	Intergenic	0.9939	1	0.6318,1.5636	0.9187	0.776965	0.6262,1.3478	1.0701	0.615031	0.8125,1.4094	1.058	0.638124	0.8440,1.3264	1.0927	0.703429	0.6784,1.7599	0.8331	0.469638	0.5368,1.2928	0.7325	0.242501	0.4553,1.1786	0.7855	0.225562	0.5391,1.1446	0.9436	1	0.5015,1.7754	0.5531	0.0929439	0.2852,1.0725	0.5134	0.127702	0.2286,1.1534	0.7447	0.385188	0.4279,1.2960	0.8196	0.21061	0.6124,1.0971	1.1407	0.232713	0.9213,1.4124	1.1187	0.663607	0.6535,1.9152	0.7281	0.287637	0.4267,1.2423
psorisis_GSE14905_skin	All	1.0667	0.582525	0.8448,1.3468	0.8936	0.422797	0.6939,1.1508	1.118	0.140402	0.9652,1.2951	0.8935	0.170549	0.7621,1.0477	1.0532	0.68707	0.8141,1.3625	0.8044	0.154582	0.6013,1.0760	0.7015	0.0062529	0.5422,0.9075	0.8684	0.275177	0.6844,1.1017	0.8368	0.397189	0.5850,1.1968	0.7419	0.145954	0.5068,1.0860	0.5777	0.00658181	0.3836,0.8700	0.6941	0.0570003	0.4743,1.0157	0.9595	0.600594	0.8271,1.1132	0.9955	1	0.8583,1.1546	0.629	0.0112182	0.4355,0.9084	0.8031	0.215684	0.5755,1.1206
	Sense	1.1908	0.249568	0.8828,1.6063	0.7504	0.135147	0.5190,1.0847	1.1273	0.220753	0.9311,1.3649	0.8158	0.0712718	0.6557,1.0149	0.7617	0.209083	0.5129,1.1311	0.5598	0.0109787	0.3537,0.8860	0.6208	0.0142541	0.4186,0.9207	0.8164	0.284617	0.5739,1.1612	0.9508	1	0.5983,1.5109	0.5998	0.0800921	0.3370,1.0675	0.7071	0.200305	0.4346,1.1503	0.7223	0.235977	0.4439,1.1751	1.0176	0.846275	0.8426,1.2291	1.0707	0.463068	0.8880,1.2910	0.7226	0.224089	0.4376,1.1933	0.642	0.11658	0.3761,1.0959
	Anti-sense	0.9751	1	0.6979,1.3624	1.0255	0.864525	0.7369,1.4271	1.1369	0.191146	0.9422,1.3718	0.9345	0.542895	0.7621,1.1460	1.3167	0.112691	0.9519,1.8214	1.0916	0.638031	0.7659,1.5559	0.7522	0.101981	0.5415,1.0447	0.944	0.764642	0.6988,1.2753	0.8209	0.555768	0.4965,1.3571	0.8939	0.81192	0.5484,1.4570	0.4261	0.0105233	0.2111,0.8600	0.7194	0.272594	0.4127,1.2540	0.9527	0.639072	0.7901,1.1489	0.9841	0.924495	0.8165,1.1862	0.5535	0.019965	0.3305,0.9272	0.9264	0.838363	0.6132,1.3996
	Intragenic	1.2354	0.445225	0.7185,2.1242	0.7911	0.644179	0.4057,1.5426	1.6041	0.00722352	1.1527,2.2323	0.6313	0.0764383	0.3827,1.0414	1.9471	0.0183136	1.1437,3.3148	0.8784	1	0.4116,1.8747	1.5418	0.104329	0.9099,2.6127	0.7025	0.508826	0.3301,1.4947	0.9338	1	0.3424,2.5469	0.4656	0.446139	0.1146,1.8923	0.3641	0.523785	0.0504,2.6317	1.5739	0.333053	0.5691,4.3525	1.1323	0.496547	0.7899,1.6233	0.9259	0.769558	0.6227,1.3768	0.7864	0.836534	0.3214,1.9240	0.9719	1	0.4280,2.2073
	Intergenic	1.0813	0.523626	0.8488,1.3774	0.9066	0.519619	0.6972,1.1789	1.1162	0.152586	0.9603,1.2976	0.9357	0.445837	0.7968,1.0988	1.0785	0.575616	0.8269,1.4067	0.8447	0.289701	0.6276,1.1369	0.663	0.00226578	0.5050,0.8704	0.9192	0.554	0.7232,1.1683	0.8285	0.384496	0.5727,1.1985	0.7569	0.187705	0.5135,1.1158	0.5755	0.00727148	0.3788,0.8742	0.6687	0.0427664	0.4507,0.9922	0.954	0.564609	0.8188,1.1115	1.0202	0.786081	0.8771,1.1866	0.6155	0.0105656	0.4180,0.9063	0.8281	0.332972	0.5879,1.1663
psorisis_GSE32407_skin	All	8.2831	0.161327	0.7507,91.3997	0	1	0.6972,1.1789	2.665	0.40306	0.2416,29.3973	2.3697	0.136499	0.7295,7.6985	0	1	0.8269,1.4067	3.7202	0.120727	0.8237,16.8010	7.0383	0.186156	0.6379,77.6588	1.1726	0.590481	0.1524,9.0232	16.8418	0.0841196	1.5256,185.9297	0	1	0.5135,1.1158	0	1	0.3788,0.8742	0	1	0.4507,0.9922	9.573	0.0793089	0.8678,105.5980	1.4357	0.480553	0.3950,5.2187	0	1	0.4180,0.9063	0	1	0.5879,1.1663
	Sense	15.8662	0.0889734	1.4373,175.1498	0	1	0.6972,1.1789	5.4545	0.231424	0.4944,60.1776	3.2744	0.0896306	0.9005,11.9061	0	1	0.8269,1.4067	0	1	0.8237,16.8010	0	1	0.6379,77.6588	2.6003	0.33665	0.3377,20.0204	0	1	1.5256,185.9297	0	1	0.5135,1.1158	0	1	0.3788,0.8742	0	1	0.4507,0.9922	4.817	0.256484	0.4366,53.1432	1.7517	0.349426	0.3881,7.9072	0	1	0.4180,0.9063	0	1	0.5879,1.1663
	Anti-sense	0	1	1.4373,175.1498	0	1	0.6972,1.1789	0	1	0.4944,60.1776	0.8763	1	0.1139,6.7420	0	1	0.8269,1.4067	7.5063	0.0368255	1.6605,33.9316	12.7358	0.109191	1.1539,140.5681	0	1	0.3377,20.0204	33.5215	0.0435441	3.0336,370.4149	0	1	0.5135,1.1158	0	1	0.3788,0.8742	0	1	0.4507,0.9922	4.4445	0.273792	0.4029,49.0322	0.7405	1	0.0962,5.6969	0	1	0.4180,0.9063	0	1	0.5879,1.1663
	Intragenic	0	1	1.4373,175.1498	0	1	0.6972,1.1789	0	1	0.4944,60.1776	0	1	0.1139,6.7420	0	1	0.8269,1.4067	13.4881	0.0773541	1.7443,104.2974	0	1	1.1539,140.5681	0	1	0.3377,20.0204	0	1	3.0336,370.4149	0	1	0.5135,1.1158	0	1	0.3788,0.8742	0	1	0.4507,0.9922	0	1	0.4029,49.0322	3.7473	0.248981	0.4865,28.8648	0	1	0.4180,0.9063	0	1	0.5879,1.1663
	Intergenic	9.1253	0.14797	0.8269,100.6969	0	1	0.6972,1.1789	2.8573	0.383607	0.2590,31.5190	2.5409	0.115619	0.7821,8.2546	0	1	0.8269,1.4067	1.865	0.433688	0.2423,14.3549	7.54	0.175285	0.6833,83.1968	1.2562	0.566239	0.1632,9.6668	17.8226	0.0797464	1.6143,196.7680	0	1	0.5135,1.1158	0	1	0.3788,0.8742	0	1	0.4507,0.9922	10.3607	0.070102	0.9392,114.2888	0.9415	1	0.2086,4.2491	0	1	0.4180,0.9063	0	1	0.5879,1.1663
psorisis_GSE52471_skin	All	0.9104	0.46324	0.7236,1.1452	0.9816	0.947281	0.7560,1.2747	0.9927	0.942874	0.8623,1.1428	1.065	0.449309	0.9062,1.2518	1.0438	0.709895	0.8221,1.3254	1.136	0.344606	0.8669,1.4885	0.6744	0.00091704	0.5298,0.8585	0.8292	0.175104	0.6390,1.0760	0.6527	0.0191187	0.4517,0.9432	0.4522	0.00092038	0.2704,0.7563	0.8296	0.288444	0.6016,1.1442	0.7514	0.181747	0.5063,1.1153	0.8634	0.0414096	0.7493,0.9947	0.9715	0.745829	0.8276,1.1404	0.8479	0.321079	0.6298,1.1416	0.7794	0.212127	0.5423,1.1201
	Sense	0.8788	0.493854	0.6418,1.2033	0.8477	0.423764	0.5825,1.2335	0.9563	0.671585	0.7926,1.1540	0.9395	0.619043	0.7526,1.1730	1.0367	0.803911	0.7533,1.4267	0.8369	0.438562	0.5547,1.2627	0.582	0.00317439	0.4005,0.8457	0.8029	0.289037	0.5484,1.1756	0.5343	0.0241178	0.3070,0.9302	0.3435	0.00365962	0.1531,0.7706	0.6283	0.0494386	0.3914,1.0083	0.7924	0.42014	0.4799,1.3084	0.901	0.282381	0.7508,1.0813	1.1104	0.293736	0.9109,1.3536	0.8462	0.538756	0.5499,1.3022	0.8064	0.47297	0.4805,1.3535
	Anti-sense	0.9815	1	0.7212,1.3357	1.134	0.463659	0.8075,1.5925	1.0404	0.642737	0.8696,1.2448	1.1677	0.141287	0.9547,1.4282	1.0392	0.796463	0.7461,1.4475	1.4485	0.0342131	1.0341,2.0290	0.8063	0.16993	0.6009,1.0820	0.8505	0.377175	0.6066,1.1923	0.8238	0.513827	0.5184,1.3089	0.5384	0.0729787	0.2774,1.0450	1.1296	0.574851	0.7452,1.7125	0.7732	0.510015	0.4339,1.3779	0.9002	0.259573	0.7545,1.0740	0.8783	0.242153	0.7125,1.0826	0.8256	0.40121	0.5552,1.2277	0.7532	0.323843	0.4631,1.2250
	Intragenic	1.1939	0.481585	0.7176,1.9863	0.6066	0.319939	0.2693,1.3667	1.4151	0.045013	1.0251,1.9534	0.5946	0.0730536	0.3419,1.0341	2.1233	0.0039555	1.3153,3.4275	1.3369	0.428416	0.6818,2.6217	1.3847	0.226617	0.8301,2.3096	0.3437	0.0517934	0.1098,1.0757	0.7829	0.819373	0.2871,2.1346	0.5433	0.588738	0.1337,2.2083	1.292	0.556486	0.4673,3.5719	0.884	1	0.2154,3.6270	1.1724	0.324739	0.8443,1.6281	0.8639	0.599182	0.5568,1.3405	1.375	0.339812	0.7208,2.6227	1.3352	0.37859	0.6226,2.8632
	Intergenic	0.9119	0.480005	0.7176,1.1588	0.9898	1	0.7542,1.2989	0.9923	0.941481	0.8590,1.1463	1.122	0.16824	0.9535,1.3203	0.9968	1	0.7736,1.2844	1.1776	0.255185	0.8923,1.5541	0.6482	0.0005146	0.5032,0.8349	0.8747	0.341327	0.6726,1.1375	0.6192	0.0126661	0.4203,0.9122	0.4461	0.0012779	0.2620,0.7594	0.8184	0.247585	0.5887,1.1377	0.751	0.174798	0.5021,1.1232	0.842	0.0210369	0.7270,0.9751	0.9919	0.966801	0.8422,1.1681	0.8435	0.302597	0.6184,1.1506	0.7941	0.260592	0.5459,1.1552
asthma_GSE27011_whiteBloodCells	All	na	na	na	0	1	0.4176,1.0497	na	na	na	0	1	0.1981,18.3167	na	na	na	0	1	0.4488,31.0140	na	na	na	0	1	0.3024,20.8855	na	na	na	0	1	0.4537,1.4378	na	na	na	0	1	0.3726,1.2397	na	na	na	0	1	1.5459,30.8832	na	na	na	0	1	1.0318,95.5480
	Sense	na	na	na	0	1	0.4176,1.0497	na	na	na	0	1	0.1981,18.3167	na	na	na	0	1	0.4488,31.0140	na	na	na	0	1	0.3024,20.8855	na	na	na	0	1	0.4537,1.4378	na	na	na	0	1	0.3726,1.2397	na	na	na	0	1	1.5459,30.8832	na	na	na	0	1	1.0318,95.5480
	Anti-sense	na	na	na	0	1	0.4176,1.0497	na	na	na	0	1	0.1981,18.3167	na	na	na	0	1	0.4488,31.0140	na	na	na	0	1	0.3024,20.8855	na	na	na	0	1	0.4537,1.4378	na	na	na	0	1	0.3726,1.2397	na	na	na	0	1	1.5459,30.8832	na	na	na	0	1	1.0318,95.5480
	Intragenic	na	na	na	0	1	0.4176,1.0497	na	na	na	0	1	0.1981,18.3167	na	na	na	0	1	0.4488,31.0140	na	na	na	0	1	0.3024,20.8855	na	na	na	0	1	0.4537,1.4378	na	na	na	0	1	0.3726,1.2397	na	na	na	0	1	1.5459,30.8832	na	na	na	0	1	1.0318,95.5480
	Intergenic	na	na	na	0	1	0.4176,1.0497	na	na	na	0	1	0.1981,18.3167	na	na	na	0	1	0.4488,31.0140	na	na	na	0	1	0.3024,20.8855	na	na	na	0	1	0.4537,1.4378	na	na	na	0	1	0.3726,1.2397	na	na	na	0	1	1.5459,30.8832	na	na	na	0	1	1.0318,95.5480
asthma_GSE31773_CD4	All	1.1039	0.704048	0.2636,4.6235	1.0035	1	0.2406,4.1856	0.9869	1	0.3798,2.5640	1.1027	0.816231	0.4576,2.6576	0.659	1	0.0899,4.8315	1.239	0.678168	0.2970,5.1692	0.4536	0.721445	0.0619,3.3246	0.4135	0.728055	0.0566,3.0226	1.0854	0.608496	0.1480,7.9610	0.9896	1	0.1353,7.2378	1.0177	1	0.1388,7.4639	1.9142	0.292334	0.4586,7.9899	1.5959	0.243459	0.7165,3.5544	0.7973	0.823565	0.3092,2.0558	0.8801	1	0.1200,6.4536	0.8024	1	0.1097,5.8674
	Sense	1.0226	1	0.1394,7.4993	0	0.627472	0.2406,4.1856	1.5588	0.340208	0.5463,4.4479	1.8192	0.213	0.7052,4.6932	1.2263	0.564628	0.1672,8.9954	0	1	0.2970,5.1692	0	0.626061	0.0619,3.3246	0	0.627959	0.0566,3.0226	2.0895	0.388041	0.2846,15.3416	1.905	0.415593	0.2602,13.9481	1.7587	0.441467	0.2396,12.9078	1.6033	0.471166	0.2190,11.7353	2.2253	0.117045	0.9151,5.4114	0.9028	1	0.2763,2.9503	0	1	0.1200,6.4536	1.7414	0.444054	0.2379,12.7480
	Anti-sense	1.0827	0.6094	0.1476,7.9410	2.0365	0.268951	0.4879,8.5015	0.339	0.521619	0.0463,2.4840	0.309	0.363477	0.0423,2.2584	0	1	0.1672,8.9954	2.5001	0.201148	0.5987,10.4406	0.8208	1	0.1119,6.0184	0.7483	1	0.1023,5.4717	0	1	0.2846,15.3416	0	1	0.2602,13.9481	0	1	0.2396,12.9078	2.0964	0.386485	0.2863,15.3535	1.2699	0.55985	0.4451,3.6230	0.8329	1	0.2549,2.7218	1.5739	0.477945	0.2145,11.5497	0	1	0.2379,12.7480
	Intragenic	0	1	0.1476,7.9410	0	1	0.4879,8.5015	1.6412	0.464008	0.2236,12.0443	0	1	0.0423,2.2584	0	1	0.1672,8.9954	0	1	0.5987,10.4406	0	1	0.1119,6.0184	0	1	0.1023,5.4717	0	1	0.2846,15.3416	0	1	0.2602,13.9481	0	1	0.2396,12.9078	0	1	0.2863,15.3535	0	1	0.4451,3.6230	0	1	0.2549,2.7218	0	1	0.2145,11.5497	0	1	0.2379,12.7480
	Intergenic	1.2163	0.681995	0.2904,5.0943	1.1056	0.70367	0.2650,4.6118	1.0582	0.806402	0.4073,2.7493	1.1824	0.637678	0.4906,2.8497	0.7214	1	0.0984,5.2892	1.3564	0.661308	0.3251,5.6594	0.4859	0.72035	0.0663,3.5617	0.443	0.723335	0.0606,3.2382	1.1486	0.588078	0.1566,8.4251	1.0472	0.620963	0.1432,7.6598	1.0589	0.617449	0.1444,7.7660	1.9916	0.277205	0.4771,8.3138	1.7274	0.224135	0.7755,3.8474	0.8629	1	0.3346,2.2252	0.9599	1	0.1309,7.0394	0.8751	1	0.1197,6.3999
asthma_GSE31773_CD8	All	0.8278	1	0.1110,6.1718	1.2492	0.486435	0.6754,2.3102	0.2663	0.234377	0.0357,1.9848	1.1577	0.50968	0.7684,1.7442	1.0219	1	0.1370,7.6206	0.8113	0.848323	0.3581,1.8379	0	0.396	0.0663,3.5617	1.0604	0.871544	0.5735,1.9607	3.5478	0.121918	0.8250,15.2568	0.6542	0.633586	0.2082,2.0550	0	1	0.1444,7.7660	0.2013	0.0979384	0.0281,1.4399	0.2391	0.156834	0.0321,1.7819	1.1783	0.398109	0.7945,1.7476	0	1	0.1309,7.0394	1.0847	0.826404	0.4785,2.4588
	Sense	0	1	0.1110,6.1718	1.2613	0.486165	0.5563,2.8602	0.5451	1	0.0731,4.0633	1.1529	0.563768	0.6761,1.9661	1.9015	0.420507	0.2548,14.1880	0.7393	0.801571	0.2353,2.3231	0	1	0.0663,3.5617	1.9054	0.0639135	0.9689,3.7469	3.2401	0.275458	0.4339,24.1972	0.8341	1	0.2061,3.3757	0	1	0.1444,7.7660	0	0.122525	0.0281,1.4399	0	0.254521	0.0321,1.7819	1.2489	0.339376	0.7631,2.0439	0	1	0.1309,7.0394	1.1533	0.747796	0.3666,3.6286
	Anti-sense	1.6789	0.460332	0.2250,12.5250	1.336	0.466962	0.5891,3.0299	0.5256	1	0.0705,3.9181	0.9491	1	0.5372,1.6767	0	1	0.2548,14.1880	0.8013	1	0.2550,2.5184	0	1	0.0663,3.5617	0.6641	0.531889	0.2456,1.7955	3.35	0.267831	0.4485,25.0201	0.4274	0.733037	0.0597,3.0606	0	1	0.1444,7.7660	0.4549	0.728904	0.0635,3.2582	0.4441	0.716626	0.0596,3.3107	1.225	0.42417	0.7571,1.9820	0	1	0.1309,7.0394	0.9496	1	0.3020,2.9859
	Intragenic	0	1	0.2250,12.5250	0	0.650941	0.5891,3.0299	0	1	0.0705,3.9181	0	0.079639	0.5372,1.6767	0	1	0.2548,14.1880	1.0323	0.622726	0.1437,7.4160	0	1	0.0663,3.5617	2.5498	0.119439	0.8070,8.0561	15.4348	0.066329	2.0500,116.2134	1.9693	0.402099	0.2728,14.2192	0	1	0.1444,7.7660	0	1	0.0635,3.2582	0	1	0.0596,3.3107	1.1754	0.588076	0.4342,3.1820	0	1	0.1309,7.0394	1.3301	0.531518	0.1849,9.5711
	Intergenic	0.9119	1	0.1223,6.7997	1.377	0.279129	0.7444,2.5472	0.2855	0.351382	0.0383,2.1281	1.2418	0.310909	0.8242,1.8710	1.1187	0.600945	0.1500,8.3424	0.8884	1	0.3921,2.0129	0	0.638351	0.0663,3.5617	1.1365	0.619428	0.6146,2.1015	3.7547	0.111321	0.8730,16.1479	0.458	0.45349	0.1133,1.8511	0	1	0.1444,7.7660	0.2095	0.0956934	0.0293,1.4982	0.2588	0.234549	0.0347,1.9286	1.2247	0.327585	0.8217,1.8254	0	1	0.1309,7.0394	1.1836	0.6479	0.5221,2.6836
asthma_GSE43696_bronchialEpithellialCells	All	0.719	0.690421	0.2933,1.7628	2.0026	0.0978203	0.9127,4.3943	1.265	0.315197	0.8020,1.9952	0.9689	1	0.4935,1.9021	0.8882	1	0.3622,2.1783	0.9889	1	0.3100,3.1545	1.005	1	0.4898,2.0623	1.173	0.61979	0.4705,2.9244	1.161	0.780198	0.4274,3.1532	1.6303	0.43797	0.5107,5.2044	0.5337	0.59172	0.1317,2.1625	1.5284	0.453716	0.4788,4.8784	1.1971	0.399542	0.7646,1.8744	1.3144	0.409884	0.7270,2.3762	1.1873	0.61821	0.4839,2.9133	3.3093	0.00792199	1.5067,7.2681
	Sense	0.5362	0.591334	0.1323,2.1728	3.8485	0.00364516	1.7516,8.4558	1.2128	0.508004	0.6670,2.2051	0.5271	0.370526	0.1653,1.6804	0.6432	0.772865	0.1587,2.6071	0.5933	1	0.0822,4.2825	0.7989	1	0.2535,2.5178	0.9899	1	0.2418,4.0518	1.097	0.705494	0.2703,4.4525	3.1454	0.0767264	0.9835,10.0593	0.4567	0.728276	0.0637,3.2753	0	0.633883	0.4788,4.8784	1.5934	0.0830558	0.9524,2.6658	1.5497	0.203214	0.7657,3.1364	0.496	0.726473	0.0692,3.5580	3.9035	0.0230344	1.4136,10.7788
	Anti-sense	1.158	0.780456	0.4264,3.1453	1.0656	0.712724	0.2603,4.3623	1.2791	0.413961	0.7182,2.2780	1.2699	0.506942	0.5790,2.7851	1.0561	0.763243	0.3349,3.3307	1.3082	0.668002	0.3194,5.3573	1.5803	0.225277	0.7347,3.3990	1.6713	0.312394	0.6066,4.6047	1.1343	0.697538	0.2795,4.6044	1.0452	0.619273	0.1447,7.5523	0.5972	1	0.0832,4.2852	3.4631	0.0614569	1.0825,11.0797	0.8072	0.648448	0.4220,1.5439	1.0727	0.836034	0.4892,2.3522	1.6862	0.309205	0.6202,4.5845	3.2129	0.041799	1.1643,8.8657
	Intragenic	0.9498	1	0.1322,6.8256	1.7695	0.436211	0.2445,12.8058	0.4262	0.732754	0.0594,3.0562	1.6163	0.357706	0.3945,6.6221	1.355	0.525061	0.1882,9.7535	0	1	0.3194,5.3573	2.211	0.233729	0.5430,9.0022	0	1	0.6066,4.6047	0	1	0.2795,4.6044	4.8159	0.191516	0.6611,35.0842	0	1	0.0832,4.2852	0	1	1.0825,11.0797	1.1524	0.747709	0.3653,3.6351	0.7013	1	0.0971,5.0635	3.5478	0.113626	0.8681,14.4998	0	1	1.1643,8.8657
	Intergenic	0.6279	0.532678	0.2314,1.7037	2.207	0.0822274	1.0057,4.8435	1.3567	0.197842	0.8601,2.1400	1.0389	0.861966	0.5292,2.0397	0.7707	0.82073	0.2840,2.0916	1.0827	0.757633	0.3394,3.4540	1.077	0.848578	0.5248,2.2101	1.2568	0.602021	0.5041,3.1335	1.2288	0.572646	0.4524,3.3380	1.7255	0.261991	0.5405,5.5089	0.5553	0.589404	0.1370,2.2502	1.5903	0.443635	0.4982,5.0765	1.0989	0.709078	0.6855,1.7616	1.4228	0.238287	0.7869,2.5724	1.2954	0.598988	0.5278,3.1792	3.6112	0.0050797	1.6439,7.9331
GSE45829_B_EBV	All	0.588	0.0570086	0.3374,1.0248	0.9963	1	0.8320,1.1930	1.0088	0.943341	0.7641,1.3318	1.0577	0.335725	0.9451,1.1837	0.786	0.459961	0.4596,1.3443	0.9238	0.479941	0.7535,1.1327	0.7026	0.174401	0.4366,1.1307	1.0359	0.669071	0.8779,1.2222	1.0113	0.87721	0.5529,1.8499	1.0057	0.949325	0.7844,1.2894	0.7692	0.54723	0.3957,1.4953	1.0285	0.80518	0.8098,1.3062	0.9227	0.631188	0.7003,1.2158	1.1033	0.0762615	0.9909,1.2284	0.5129	0.0897445	0.2421,1.0862	0.6889	0.00466485	0.5299,0.8955
	Sense	0.5965	0.225575	0.2815,1.2638	1.0031	0.950761	0.7876,1.2777	1.226	0.224949	0.8744,1.7189	1.0974	0.219549	0.9487,1.2695	0.5075	0.140193	0.2093,1.2302	0.9305	0.686053	0.7092,1.2208	0.7602	0.548219	0.3911,1.4777	1.0761	0.539551	0.8519,1.3593	0.691	0.669111	0.2568,1.8592	1.0385	0.794379	0.7425,1.4526	0.7295	0.694114	0.3006,1.7707	0.9365	0.749257	0.6788,1.2921	0.8004	0.286244	0.5469,1.1716	1.1193	0.108847	0.9754,1.2845	0.6312	0.538676	0.2347,1.6979	0.7013	0.066833	0.4806,1.0234
	Anti-sense	0.6318	0.278349	0.2981,1.3389	0.9708	0.898923	0.7548,1.2487	0.8091	0.356303	0.5458,1.1995	1.0256	0.733826	0.8855,1.1878	1.1239	0.731157	0.5968,2.1163	0.9184	0.624244	0.6916,1.2195	0.6192	0.174006	0.3187,1.2030	0.9972	1	0.8011,1.2412	1.2699	0.513107	0.5974,2.6995	0.9213	0.723991	0.6441,1.3177	0.761	0.823106	0.2827,2.0485	1.1197	0.523325	0.7961,1.5748	0.9666	0.931468	0.6870,1.3601	1.06	0.397131	0.9255,1.2141	0.3879	0.0961432	0.1242,1.2119	0.6563	0.0184315	0.4607,0.9350
	Intragenic	0.2979	0.270368	0.0417,2.1285	1.0969	0.647804	0.7128,1.6877	0.8203	0.849432	0.3645,1.8459	1.1323	0.394528	0.8483,1.5113	0.4249	0.733686	0.0594,3.0417	0.7198	0.342207	0.3904,1.3271	0.6894	1	0.1707,2.7846	0.9733	1	0.5998,1.5794	1.6437	0.348736	0.4034,6.6973	0.6138	0.352748	0.2490,1.5127	1.3101	0.538268	0.1809,9.4865	1.2487	0.632686	0.5358,2.9101	0.4783	0.155332	0.1780,1.2852	0.7605	0.0938039	0.5525,1.0469	0.5476	1	0.0764,3.9257	0.4085	0.0437835	0.1671,0.9987
	Intergenic	0.6483	0.159074	0.3719,1.1302	1.0146	0.885635	0.8416,1.2230	1.0609	0.662373	0.8020,1.4034	1.0527	0.386173	0.9379,1.1814	0.8612	0.700395	0.5034,1.4733	0.9643	0.792595	0.7824,1.1884	0.665	0.131539	0.4021,1.0998	1.0695	0.427947	0.9036,1.2658	0.9697	1	0.5153,1.8248	1.0013	1	0.7754,1.2930	0.7089	0.442016	0.3507,1.4329	1.0104	0.900127	0.7907,1.2912	0.9799	0.943915	0.7422,1.2936	1.1426	0.0178356	1.0244,1.2744	0.5597	0.142877	0.2642,1.1856	0.7151	0.0137386	0.5463,0.9359
grave_GSE71957_CD4	All	0.9421	0.705065	0.7314,1.2137	0.7856	0.0767039	0.6033,1.0229	1.0178	0.810097	0.8706,1.1899	0.8694	0.0881226	0.7417,1.0191	1.0183	0.889674	0.7777,1.3335	0.8721	0.383136	0.6604,1.1518	0.8353	0.159016	0.6521,1.0699	0.8721	0.280373	0.6894,1.1032	0.8001	1	0.2961,2.1620	0.7229	1	0.1778,2.9387	0	0.0116619	0.3634,0.8708	1.0289	0.768424	0.3252,3.2555	0.664	0.0850805	0.4202,1.0492	0.8968	0.786629	0.5162,1.5581	0.8161	0.836105	0.3345,1.9908	0.8895	1	0.2812,2.8137
	Sense	0.9026	0.611194	0.6375,1.2781	0.5791	0.00654758	0.3845,0.8722	0.9698	0.833032	0.7869,1.1952	0.8752	0.221659	0.7093,1.0800	0.8191	0.3557	0.5514,1.2166	0.6983	0.0890199	0.4631,1.0528	0.8873	0.555592	0.6268,1.2563	0.9007	0.624586	0.6450,1.2578	0.76	1	0.1879,3.0738	0.6876	1	0.0956,4.9435	0	0.0802537	0.3634,0.8708	1.1721	0.690104	0.2880,4.7698	0.8526	0.693777	0.4929,1.4749	1.0079	1	0.5067,2.0052	1.0504	0.764562	0.3342,3.3016	0	0.413061	0.2812,2.8137
	Anti-sense	1.0187	0.861774	0.7257,1.4298	1.0011	1	0.7195,1.3930	1.052	0.603856	0.8617,1.2844	0.8523	0.14531	0.6915,1.0506	1.1492	0.441244	0.8061,1.6384	1.2419	0.19347	0.8909,1.7310	0.8094	0.220591	0.5825,1.1246	0.8997	0.553125	0.6640,1.2191	0.7859	1	0.1943,3.1787	0.7109	1	0.0989,5.1116	0	0.181821	0.3634,0.8708	0.7567	1	0.1052,5.4416	0.547	0.0740266	0.2885,1.0372	0.9298	1	0.4674,1.8495	0.5722	0.590355	0.1416,2.3122	1.5931	0.443322	0.5030,5.0460
	Intragenic	0.6407	0.34347	0.3016,1.3613	0.6834	0.362049	0.3372,1.3853	1.3886	0.0876342	0.9672,1.9938	0.6165	0.0631922	0.3738,1.0169	1.3471	0.347237	0.7097,2.5567	1.1181	0.71635	0.5704,2.1917	0.8491	0.865884	0.4181,1.7242	0.5849	0.253185	0.2593,1.3191	0	1	0.1943,3.1787	0	1	0.0989,5.1116	0	1	0.3634,0.8708	0	1	0.1052,5.4416	0.5269	0.594641	0.1304,2.1288	1.9806	0.153321	0.7254,5.4080	1.2128	0.564353	0.1686,8.7221	2.2123	0.367653	0.3062,15.9845
	Intergenic	1.0249	0.84333	0.7938,1.3233	0.7903	0.0976696	0.6002,1.0407	1.0124	0.869616	0.8625,1.1884	0.9045	0.233666	0.7702,1.0622	1.056	0.665076	0.8007,1.3926	0.9006	0.52941	0.6766,1.1988	0.8402	0.203442	0.6513,1.0838	0.9235	0.558345	0.7288,1.1703	0.8469	1	0.3134,2.2887	0.765	1	0.1882,3.1103	0	0.0109103	0.3634,0.8708	1.0706	0.760338	0.3383,3.3877	0.68	0.118693	0.4261,1.0850	0.8204	0.578585	0.4566,1.4741	0.8904	1	0.3649,2.1725	0.9703	1	0.3067,3.0698
grave_GSE71957_CD8	All	1.1712	0.536912	0.6658,2.0601	0.7974	0.574396	0.4345,1.4634	0.9571	0.921914	0.6480,1.4135	1.0718	0.656862	0.7620,1.5076	0.5305	0.176495	0.2179,1.2913	0.9859	1	0.5370,1.8102	0.9941	1	0.5653,1.7480	1.1474	0.515807	0.7081,1.8593	1.7717	0.443436	0.2369,13.2510	0.9345	1	0.1280,6.8245	0	1	0.3634,0.8708	1.8046	0.315184	0.4334,7.5152	0	0.0363815	0.4261,1.0850	0.4218	0.189902	0.1295,1.3740	1.4366	0.513292	0.1921,10.7420	1.5604	0.378031	0.3748,6.4966
	Sense	0.9957	1	0.4406,2.2505	0.6755	0.567802	0.2778,1.6422	0.9638	1	0.5770,1.6096	1.1628	0.481612	0.7549,1.7910	0.586	0.49627	0.1869,1.8373	1.3197	0.407312	0.6497,2.6808	0.811	0.836526	0.3329,1.9756	1.6573	0.0907008	0.9238,2.9732	3.4107	0.264251	0.4556,25.5358	0	1	0.1280,6.8245	0	1	0.3634,0.8708	0	1	0.4334,7.5152	0	0.250923	0.4261,1.0850	0.8496	1	0.2608,2.7682	3.1178	0.284939	0.4165,23.3386	0	1	0.3748,6.4966
	Anti-sense	1.2385	0.519745	0.5806,2.6417	0.8632	1	0.3827,1.9471	0.9931	1	0.6029,1.6358	1.0667	0.729547	0.6867,1.6571	0.4206	0.339684	0.1042,1.6974	0.6991	0.667563	0.2595,1.8839	1.0778	0.849957	0.5298,2.1925	0.8805	0.865139	0.4340,1.7865	0	1	0.4556,25.5358	1.8601	0.422714	0.2544,13.5988	0	1	0.3634,0.8708	4.0833	0.0928843	0.9787,17.0365	0	0.255458	0.4261,1.0850	0.5075	0.580808	0.1220,2.1110	0	1	0.4165,23.3386	2.7926	0.170073	0.6700,11.6389
	Intragenic	1.1608	0.692291	0.2866,4.7007	0	0.279828	0.3827,1.9471	1.327	0.435884	0.5439,3.2376	1.0872	0.810661	0.4465,2.6471	0	0.637705	0.1042,1.6974	2.0648	0.184002	0.6548,6.5117	2.0212	0.191789	0.6411,6.3717	0.5433	1	0.0759,3.8903	0	1	0.4556,25.5358	0	1	0.2544,13.5988	0	1	0.3634,0.8708	0	1	0.9787,17.0365	0	1	0.4261,1.0850	0	1	0.1220,2.1110	0	1	0.4165,23.3386	0	1	0.6700,11.6389
	Intergenic	1.1846	0.519284	0.6591,2.1289	0.8791	0.883077	0.4789,1.6136	0.9862	1	0.6641,1.4646	1.0809	0.64837	0.7630,1.5312	0.5809	0.288208	0.2386,1.4141	0.9767	1	0.5172,1.8446	0.9775	1	0.5441,1.7562	1.23	0.417563	0.7589,1.9934	1.8749	0.425473	0.2507,14.0236	0.9889	1	0.1354,7.2224	0	1	0.3634,0.8708	1.8777	0.299255	0.4509,7.8199	0	0.0613374	0.4261,1.0850	0.4566	0.261733	0.1402,1.4871	1.5668	0.483799	0.2095,11.7170	1.702	0.339664	0.4087,7.0871
myeloma_GSE36474_boneMarrow	All	1.8407	0.316698	0.4267,7.9401	0.9461	1	0.2273,3.9370	2.2857	0.114778	0.8779,5.9510	0.6456	0.504472	0.2286,1.8234	0	1	0.3570,1.8274	0.5674	1	0.0777,4.1418	0.7404	1	0.0991,5.5339	0	0.174482	0.1552,1.5510	0.7196	0.384569	0.3705,1.3979	1.1235	0.651632	0.6437,1.9609	0.8301	0.671351	0.4544,1.5164	0.4732	0.0782894	0.2107,1.0627	0.8236	0.175927	0.6292,1.0780	0.8683	0.35273	0.6613,1.1401	0.3843	0.0116269	0.1712,0.8624	1.2052	0.415158	0.7385,1.9670
	Sense	1.6691	0.462813	0.2232,12.4826	1.8132	0.313256	0.4354,7.5509	3.6406	0.0221834	1.3220,10.0257	0.6228	0.766666	0.1497,2.5912	0	1	0.3570,1.8274	1.0558	0.617708	0.1446,7.7112	0	1	0.0991,5.5339	0	0.630765	0.1552,1.5510	0.3005	0.0725712	0.0747,1.2095	2.0136	0.0234939	1.1247,3.6051	0.7718	0.712728	0.3431,1.7360	0.6812	0.568234	0.2808,1.6529	0.829	0.358042	0.5826,1.1794	0.9149	0.668004	0.6454,1.2970	0.1367	0.0117993	0.0192,0.9748	0.5896	0.42802	0.2193,1.5852
	Anti-sense	1.7673	0.44424	0.2363,13.2179	0	0.627756	0.4354,7.5509	1.1686	0.690834	0.2710,5.0392	0.6006	0.768027	0.1444,2.4985	0	1	0.3570,1.8274	1.1441	0.588665	0.1566,8.3570	1.3398	0.537483	0.1792,10.0176	0	0.403311	0.1552,1.5510	1.1141	0.685408	0.5245,2.3661	0.1644	0.0343838	0.0230,1.1727	0.8394	1	0.3456,2.0386	0.175	0.0492634	0.0245,1.2485	0.8895	0.571386	0.6385,1.2390	0.8433	0.404761	0.5949,1.1953	0.5726	0.293907	0.2362,1.3883	1.6399	0.102599	0.9378,2.8677
	Intragenic	5.97	0.161542	0.7961,44.7695	0	1	0.4354,7.5509	2.6789	0.322733	0.3580,20.0476	1.413	0.513804	0.1934,10.3249	0	1	0.3570,1.8274	0	1	0.1566,8.3570	0	1	0.1792,10.0176	0	1	0.1552,1.5510	0.7126	1	0.0991,5.1247	2.335	0.144821	0.7360,7.4079	1.1516	0.584431	0.1591,8.3357	0	1	0.0245,1.2485	0.3137	0.0289353	0.1005,0.9794	1.3859	0.297539	0.7760,2.4753	0.972	1	0.2398,3.9394	2.6627	0.0454368	1.0843,6.5392
	Intergenic	2.028	0.279086	0.4701,8.7485	1.0423	0.718473	0.2505,4.3379	2.4508	0.105033	0.9413,6.3811	0.6923	0.645396	0.2451,1.9551	0	1	0.3570,1.8274	0.6211	1	0.0851,4.5341	0.7932	1	0.1061,5.9286	0	0.170116	0.1552,1.5510	0.762	0.548408	0.3922,1.4804	1.1899	0.535597	0.6816,2.0774	0.7827	0.564025	0.4164,1.4709	0.4925	0.100286	0.2193,1.1060	0.8755	0.355201	0.6677,1.1481	0.8337	0.220617	0.6275,1.1075	0.3482	0.00881231	0.1438,0.8431	1.1529	0.569961	0.6855,1.9392
GSE12453_HodgkinLymphoma_vs_centroblasts	All	0.9582	0.739624	0.7682,1.1952	0.7403	0.166273	0.4903,1.1178	1.017	0.805266	0.8865,1.1668	0.9434	0.681546	0.7464,1.1924	0.7415	0.0281796	0.5659,0.9716	1.4209	0.0530289	1.0090,2.0010	0.7466	0.0113081	0.5948,0.9371	1.1184	0.49147	0.8109,1.5425	0.6273	0.0110706	0.4341,0.9064	0.7994	0.522421	0.4591,1.3917	0.5868	0.00282275	0.4063,0.8475	1.0527	0.80379	0.6550,1.6920	1.0681	0.324481	0.9373,1.2173	0.894	0.365723	0.7105,1.1249	0.7586	0.0816035	0.5584,1.0306	0.7501	0.352571	0.4473,1.2577
	Sense	0.866	0.411433	0.6347,1.1817	0.6328	0.169718	0.3470,1.1539	1.0016	0.963078	0.8354,1.2009	0.9089	0.590186	0.6640,1.2442	0.7121	0.0733366	0.4924,1.0298	1.6545	0.0287824	1.0827,2.5281	0.8086	0.207899	0.5886,1.1108	1.1013	0.622619	0.6935,1.7489	0.4728	0.00616145	0.2658,0.8411	0.6991	0.485168	0.3109,1.5717	0.4993	0.00491503	0.2980,0.8365	0.8911	0.872531	0.4585,1.7319	1.0628	0.481233	0.8977,1.2582	0.9048	0.558121	0.6712,1.2196	0.6579	0.0869903	0.4097,1.0566	0.6384	0.399135	0.2841,1.4346
	Anti-sense	1.0132	0.938831	0.7515,1.3660	0.7973	0.522628	0.4580,1.3882	1.0052	0.9636	0.8409,1.2017	1.0126	0.939428	0.7531,1.3615	0.8019	0.271583	0.5573,1.1540	1.4646	0.119392	0.9209,2.3294	0.6711	0.0103388	0.4909,0.9174	1.2498	0.261795	0.8391,1.8616	0.7478	0.284769	0.4651,1.2024	0.8472	0.858477	0.3995,1.7968	0.7982	0.440325	0.4961,1.2843	1.1709	0.581764	0.6014,2.2796	1.1458	0.0965006	0.9770,1.3437	0.8725	0.394993	0.6508,1.1696	0.8589	0.520848	0.5855,1.2599	0.7962	0.646251	0.4099,1.5465
	Intragenic	0.9189	0.890457	0.5246,1.6097	0.1998	0.100803	0.0280,1.4263	0.7614	0.223904	0.5042,1.1498	1.2179	0.437053	0.6980,2.1250	1.2284	0.508743	0.6821,2.2123	0.285	0.270919	0.0398,2.0383	0.8048	0.656701	0.4258,1.5210	1.1776	0.621393	0.4832,2.8698	0.3677	0.177331	0.0905,1.4940	0.5437	1	0.0756,3.9083	0.9143	1	0.2857,2.9258	0	0.631746	0.6014,2.2796	0.909	0.660271	0.6346,1.3021	0.9869	1	0.5539,1.7584	0.503	0.195426	0.1858,1.3616	0.3672	0.529187	0.0513,2.6307
	Intergenic	0.981	0.90793	0.7805,1.2330	0.7807	0.288773	0.5126,1.1891	1.0311	0.665029	0.8963,1.1862	0.9554	0.764002	0.7523,1.2134	0.7226	0.0259896	0.5434,0.9609	1.5594	0.014651	1.1069,2.1968	0.7701	0.0254103	0.6110,0.9706	1.1677	0.330671	0.8434,1.6166	0.6652	0.0271245	0.4602,0.9616	0.7791	0.510269	0.4377,1.3865	0.5899	0.00383323	0.4059,0.8573	1.0962	0.703818	0.6819,1.7621	1.0903	0.20914	0.9542,1.2457	0.9162	0.48656	0.7249,1.1579	0.7699	0.110879	0.5606,1.0574	0.8191	0.545897	0.4883,1.3740
GSE12453_HodgkinLymphoma_vs_centrocytes	All	0.9174	0.568901	0.7096,1.1861	0.7886	0.259322	0.5414,1.1485	1.0197	0.809419	0.8719,1.1925	0.8545	0.186669	0.6807,1.0727	0.8159	0.210139	0.6063,1.0980	1.1974	0.294952	0.8477,1.6914	0.683	0.00460969	0.5214,0.8948	1.0487	0.746929	0.7692,1.4296	0.6976	0.0797531	0.4666,1.0432	0.9239	0.904291	0.5678,1.5035	0.517	0.00211159	0.3306,0.8085	1.1907	0.414109	0.7809,1.8155	1.073	0.352182	0.9246,1.2452	0.8176	0.0797386	0.6547,1.0209	0.7537	0.130696	0.5302,1.0715	0.7463	0.276575	0.4590,1.2134
	Sense	0.8805	0.55075	0.6188,1.2528	0.71	0.243074	0.4162,1.2111	0.9549	0.711426	0.7734,1.1791	0.8084	0.192707	0.5934,1.1013	0.7247	0.138018	0.4765,1.1021	1.3087	0.250564	0.8418,2.0347	0.591	0.0109612	0.3891,0.8979	0.855	0.642798	0.5256,1.3908	0.526	0.0409512	0.2802,0.9873	0.9287	1	0.4776,1.8057	0.3959	0.00268169	0.2043,0.7673	0.9594	1	0.5251,1.7527	1.0275	0.763288	0.8455,1.2486	0.8746	0.408982	0.6583,1.1619	0.6296	0.107802	0.3617,1.0959	0.6543	0.344259	0.3089,1.3858
	Anti-sense	0.9041	0.661619	0.6319,1.2935	0.8085	0.54788	0.4822,1.3557	1.06	0.566743	0.8681,1.2942	0.9366	0.721516	0.7031,1.2476	0.8965	0.699332	0.6032,1.3324	1.3495	0.186369	0.8587,2.1207	0.724	0.0763701	0.5120,1.0238	1.2695	0.20595	0.8753,1.8411	0.83	0.544212	0.4942,1.3942	0.8506	0.866795	0.4207,1.7200	0.7621	0.449715	0.4371,1.3285	1.5044	0.164951	0.8606,2.6296	1.1752	0.0800477	0.9817,1.4069	0.7888	0.110041	0.5924,1.0503	0.8094	0.403678	0.5162,1.2693	0.7763	0.565417	0.4133,1.4580
	Intragenic	0.741	0.527709	0.3655,1.5022	0.352	0.189142	0.0874,1.4186	0.6253	0.0866271	0.3731,1.0480	0.81	0.660189	0.4312,1.5217	1.5024	0.187267	0.8138,2.7735	0.5031	0.44596	0.1245,2.0321	0.6341	0.396121	0.2811,1.4303	0.8195	1	0.3038,2.2104	0.493	0.442024	0.1213,2.0036	0.9648	1	0.2371,3.9253	0.3937	0.519931	0.0545,2.8454	0	0.641954	0.8606,2.6296	1.0623	0.762621	0.7239,1.5588	0.788	0.580459	0.4318,1.4380	0.3318	0.133489	0.0820,1.3417	0.6493	0.77303	0.1604,2.6288
	Intergenic	0.9453	0.741145	0.7253,1.2321	0.8383	0.415707	0.5718,1.2289	1.0412	0.621203	0.8878,1.2210	0.8806	0.310134	0.6991,1.1092	0.7737	0.127537	0.5636,1.0621	1.314	0.135506	0.9299,1.8568	0.7194	0.0177063	0.5478,0.9448	1.0972	0.560364	0.8020,1.5009	0.7396	0.150283	0.4944,1.1063	0.9186	0.901683	0.5563,1.5167	0.5104	0.00231464	0.3227,0.8073	1.2401	0.287448	0.8131,1.8913	1.0794	0.319895	0.9268,1.2572	0.841	0.141233	0.6707,1.0546	0.798	0.246544	0.5582,1.1408	0.8152	0.496306	0.5012,1.3259
GSE12453_HodgkinLymphoma_vs_memoryBcells	All	0.8039	0.34676	0.5364,1.2048	0.7695	0.103152	0.5644,1.0491	1.072	0.550681	0.8529,1.3475	0.8825	0.192017	0.7344,1.0604	0.5012	0.00956811	0.2883,0.8714	0.98	1	0.7205,1.3330	0.8282	0.381086	0.5714,1.2005	0.9521	0.79188	0.7315,1.2393	0.7641	0.434895	0.4294,1.3600	0.8576	0.555713	0.5685,1.2939	0.7159	0.3117	0.4023,1.2737	0.9451	0.849311	0.6449,1.3848	1.1358	0.249764	0.9142,1.4110	0.8886	0.208103	0.7448,1.0601	0.618	0.123482	0.3475,1.0990	0.4533	0.00067858	0.2755,0.7460
	Sense	0.7817	0.448621	0.4490,1.3609	0.736	0.181455	0.4796,1.1294	1.1198	0.432846	0.8345,1.5027	0.8932	0.407263	0.7010,1.1383	0.4239	0.0269324	0.1889,0.9510	1.0589	0.755046	0.7121,1.5747	0.7687	0.449982	0.4416,1.3383	0.7583	0.218652	0.4987,1.1532	0.7259	0.591743	0.3228,1.6322	0.8837	0.788454	0.5070,1.5405	0.8194	0.742563	0.4054,1.6562	0.6814	0.217307	0.3830,1.2123	0.9424	0.765511	0.6988,1.2711	0.8342	0.143647	0.6586,1.0566	0.3274	0.0394621	0.1049,1.0222	0.302	0.002772	0.1248,0.7307
	Anti-sense	0.8283	0.603341	0.4757,1.4425	0.7432	0.203091	0.4796,1.1519	0.9355	0.757035	0.6853,1.2769	0.8604	0.243689	0.6752,1.0962	0.5381	0.114038	0.2543,1.1386	0.9636	1	0.6270,1.4810	0.8789	0.731321	0.5472,1.4118	1.1395	0.437891	0.8283,1.5676	0.7508	0.715339	0.3338,1.6886	0.8413	0.682194	0.4721,1.4991	0.6635	0.457439	0.2735,1.6098	1.2946	0.322705	0.7929,2.1138	1.3374	0.029988	1.0372,1.7244	0.8925	0.35464	0.7143,1.1151	0.9221	1	0.4905,1.7335	0.5561	0.0597797	0.3051,1.0135
	Intragenic	0.6295	0.63709	0.2010,1.9716	0.4639	0.155399	0.1724,1.2486	0.5687	0.203992	0.2532,1.2773	0.8007	0.473786	0.4774,1.3431	0.9012	1	0.2869,2.8306	0.3281	0.136625	0.0813,1.3245	0.4795	0.448964	0.1188,1.9348	0.534	0.25859	0.1982,1.4387	0	0.426131	0.3338,1.6886	1.9834	0.13523	0.8650,4.5477	0.9121	1	0.1261,6.5991	1.024	0.723044	0.2495,4.2023	1.3867	0.229209	0.8377,2.2952	0.6077	0.0900723	0.3495,1.0567	0.7695	1	0.1900,3.1166	0	0.0158006	0.3051,1.0135
	Intergenic	0.8117	0.377494	0.5328,1.2366	0.7864	0.159606	0.5705,1.0840	1.1043	0.392364	0.8758,1.3925	0.9151	0.381112	0.7597,1.1023	0.5492	0.0306696	0.3158,0.9550	1.0762	0.62634	0.7908,1.4645	0.8882	0.589109	0.6127,1.2878	0.967	0.891851	0.7383,1.2667	0.8093	0.592123	0.4546,1.4406	0.711	0.15858	0.4489,1.1262	0.7452	0.368922	0.4187,1.3261	0.9472	0.92266	0.6420,1.3974	1.1274	0.287708	0.9020,1.4090	0.9022	0.284887	0.7532,1.0807	0.6166	0.138756	0.3382,1.1243	0.4951	0.00295441	0.3008,0.8151
GSE12453_HodgkinLymphoma_vs_naiveBcells	All	0.8335	0.563226	0.5107,1.3603	0.7072	0.00589175	0.5488,0.9113	1.1786	0.240585	0.8974,1.5480	0.8623	0.0496505	0.7448,0.9984	0.5911	0.125772	0.3144,1.1111	0.7785	0.0731309	0.5953,1.0181	0.7514	0.281878	0.4666,1.2101	0.8745	0.249765	0.7046,1.0853	1.0801	0.748579	0.5901,1.9767	0.8547	0.392157	0.6171,1.1837	0.727	0.440528	0.3595,1.4701	1.0459	0.762674	0.7825,1.3980	1.1607	0.288384	0.8907,1.5125	0.8979	0.138846	0.7812,1.0321	0.4673	0.0589079	0.2080,1.0499	0.6492	0.00895285	0.4656,0.9051
	Sense	0.6365	0.277888	0.3003,1.3493	0.5646	0.0018701	0.3861,0.8256	1.161	0.386157	0.8132,1.6575	0.86	0.133316	0.7078,1.0448	0.6524	0.395439	0.2901,1.4671	0.7593	0.160716	0.5280,1.0921	0.8115	0.644559	0.4173,1.5783	0.8547	0.367854	0.6243,1.1702	0.9261	1	0.3811,2.2504	0.8314	0.522568	0.5292,1.3060	0.3068	0.102235	0.0762,1.2350	0.8054	0.377728	0.5285,1.2273	1.0236	0.85481	0.7172,1.4610	0.8756	0.166861	0.7288,1.0520	0.1658	0.0341345	0.0232,1.1829	0.5208	0.0139797	0.3053,0.8886
	Anti-sense	1.0773	0.749042	0.5887,1.9717	0.8056	0.243399	0.5770,1.1247	1.1933	0.297121	0.8433,1.6885	0.8605	0.127355	0.7104,1.0423	0.5869	0.291393	0.2420,1.4236	0.883	0.549348	0.6200,1.2576	0.6611	0.261626	0.3401,1.2850	0.925	0.632949	0.7017,1.2193	1.1555	0.65443	0.5126,2.6048	0.9069	0.746199	0.5830,1.4106	1.2308	0.496533	0.5458,2.7757	1.3222	0.17971	0.8972,1.9483	1.4006	0.0406588	1.0306,1.9035	0.9118	0.320843	0.7655,1.0861	0.6959	0.566035	0.2867,1.6891	0.7174	0.137014	0.4712,1.0921
	Intragenic	1.2968	0.557309	0.4801,3.5023	0.4948	0.0678726	0.2330,1.0507	0.8752	1	0.3888,1.9703	0.4788	0.00238594	0.2859,0.8018	0.9138	1	0.2258,3.6977	0.2979	0.0196545	0.0950,0.9337	1.1109	0.754087	0.3537,3.4885	0.7415	0.455896	0.3797,1.4479	1.7525	0.32135	0.4300,7.1425	1.6271	0.170904	0.7868,3.3651	0	1	0.5458,2.7757	0.941	1	0.2941,3.0114	1.3107	0.358709	0.6954,2.4704	0.5094	0.00308434	0.3179,0.8164	0.5837	1	0.0814,4.1856	0.2547	0.0359574	0.0630,1.0297
	Intergenic	0.6927	0.227581	0.3971,1.2082	0.7301	0.0161822	0.5621,0.9484	1.2163	0.175852	0.9229,1.6030	0.9073	0.200995	0.7826,1.0518	0.5805	0.112572	0.2987,1.1280	0.8398	0.221806	0.6405,1.1011	0.758	0.318211	0.4646,1.2368	0.8946	0.359477	0.7175,1.1155	1.0354	0.869051	0.5499,1.9496	0.7827	0.175191	0.5529,1.1080	0.7566	0.528656	0.3741,1.5302	1.0669	0.644739	0.7958,1.4303	1.1448	0.344858	0.8717,1.5035	0.9368	0.377224	0.8134,1.0790	0.4232	0.0486691	0.1746,1.0257	0.7104	0.0470629	0.5093,0.9911
GSE12453_HodgkinLymphoma_vs_plasmaCells	All	0.6722	0.0248471	0.4753,0.9507	0.689	0.0451028	0.4765,0.9962	0.9612	0.704814	0.7963,1.1602	0.9112	0.415315	0.7418,1.1193	0.653	0.0268211	0.4434,0.9619	1.0077	0.929845	0.7145,1.4214	0.677	0.0149138	0.4912,0.9331	0.9461	0.765752	0.7015,1.2760	0.7517	0.255703	0.4745,1.1908	0.7812	0.374609	0.4805,1.2699	0.7038	0.159483	0.4444,1.1146	1.0983	0.591571	0.7328,1.6459	0.9735	0.819206	0.8126,1.1663	0.8249	0.069155	0.6722,1.0124	0.3774	0.00016029	0.2127,0.6695	0.631	0.0692109	0.3885,1.0248
	Sense	0.5149	0.0115582	0.3023,0.8770	0.6007	0.0655512	0.3524,1.0237	0.8852	0.382951	0.6850,1.1438	0.9363	0.688018	0.7153,1.2257	0.5737	0.0480052	0.3301,0.9971	1.1613	0.479877	0.7549,1.7865	0.811	0.424246	0.5283,1.2451	0.7673	0.334238	0.4784,1.2308	0.5214	0.0893128	0.2463,1.1037	0.6073	0.224717	0.2868,1.2863	0.6968	0.296937	0.3819,1.2713	0.9666	1	0.5546,1.6845	0.9835	0.952774	0.7787,1.2423	0.7628	0.0562632	0.5780,1.0069	0.1338	0.00011145	0.0333,0.5373	0.636	0.24472	0.3150,1.2841
	Anti-sense	0.8746	0.606619	0.5695,1.3432	0.7314	0.266718	0.4435,1.2062	1.0922	0.461111	0.8656,1.3783	0.9021	0.509473	0.6892,1.1807	0.7222	0.254988	0.4310,1.2104	0.9606	1	0.5902,1.5634	0.5653	0.0109254	0.3573,0.8944	1.1466	0.435887	0.8003,1.6426	0.9415	1	0.5282,1.6784	0.9078	0.878129	0.4827,1.7073	0.8302	0.658555	0.4415,1.5612	1.2732	0.342711	0.7290,2.2237	0.9962	1	0.7955,1.2476	0.8606	0.267868	0.6664,1.1114	0.564	0.08279	0.3007,1.0580	0.5898	0.143229	0.3041,1.1441
	Intragenic	0.9223	1	0.4337,1.9613	0.1485	0.0249602	0.0208,1.0602	0.6494	0.206385	0.3561,1.1843	0.6154	0.175691	0.3172,1.1940	0.9365	1	0.3838,2.2846	0.4269	0.337022	0.1057,1.7238	0.7507	0.691044	0.3085,1.8268	0.695	0.667674	0.2578,1.8739	0.7035	1	0.1730,2.8605	1.2434	0.737184	0.3927,3.9372	0.5616	1	0.0777,4.0604	0	0.408252	0.7290,2.2237	1.0678	0.72242	0.6803,1.6759	0.6047	0.126255	0.3223,1.1344	0.7163	0.801798	0.2277,2.2537	0.551	0.590342	0.1361,2.2300
	Intergenic	0.6498	0.0192149	0.4497,0.9389	0.7335	0.111747	0.5042,1.0673	0.9668	0.770871	0.7975,1.1719	0.9572	0.715242	0.7779,1.1778	0.6883	0.0603595	0.4639,1.0213	1.0379	0.783498	0.7286,1.4785	0.707	0.0375445	0.5109,0.9783	1.0153	0.877977	0.7527,1.3697	0.7965	0.395516	0.5026,1.2622	0.7263	0.254789	0.4334,1.2171	0.7329	0.219575	0.4627,1.1609	1.144	0.509643	0.7632,1.7148	0.9765	0.85109	0.8113,1.1753	0.8461	0.118389	0.6866,1.0425	0.3768	0.00028308	0.2071,0.6855	0.6892	0.142633	0.4242,1.1198
GSE12453_diffuseLargeBcellsLymphoma_vs_centroblasts	All	1.0324	0.802134	0.7471,1.4266	0.878	0.478775	0.6337,1.2165	0.8919	0.313088	0.7184,1.1074	0.7976	0.0356021	0.6455,0.9856	0.8063	0.312726	0.5427,1.1978	1.1816	0.298529	0.8615,1.6208	0.5739	0.00302357	0.3894,0.8458	1.0382	0.769388	0.7824,1.3778	0.4945	0.0203212	0.2638,0.9269	1.2756	0.228811	0.8690,1.8725	0.6557	0.14269	0.3846,1.1180	1.1026	0.596801	0.7414,1.6399	1.0011	1	0.8189,1.2237	0.8599	0.147601	0.7051,1.0488	0.9512	0.916403	0.6246,1.4486	0.911	0.766482	0.6085,1.3639
	Sense	0.9064	0.821373	0.5715,1.4373	0.708	0.201886	0.4357,1.1506	0.9556	0.833858	0.7230,1.2629	0.8494	0.263594	0.6450,1.1185	0.6173	0.139077	0.3386,1.1252	1.3919	0.104663	0.9412,2.0582	0.5524	0.0431724	0.3109,0.9815	0.9564	0.916418	0.6281,1.4562	0.5683	0.203784	0.2530,1.2766	1.4754	0.132917	0.9036,2.4091	0.5589	0.143823	0.2641,1.1830	1.0818	0.681909	0.6440,1.8171	0.9973	1	0.7686,1.2941	0.8979	0.453052	0.6954,1.1592	0.5189	0.127234	0.2311,1.1652	1.0135	0.886571	0.5813,1.7672
	Anti-sense	1.122	0.562948	0.7295,1.7257	0.984	1	0.6403,1.5123	0.8651	0.37048	0.6500,1.1514	0.7543	0.0517824	0.5675,1.0026	0.989	1	0.5988,1.6336	1.2149	0.338557	0.7895,1.8695	0.5663	0.0250889	0.3382,0.9482	1.1408	0.443928	0.8006,1.6256	0.3888	0.0518014	0.1448,1.0439	0.966	1	0.5284,1.7657	0.8417	0.867324	0.4162,1.7022	1.0298	0.875474	0.5631,1.8833	1.0003	1	0.7775,1.2869	0.8268	0.163599	0.6405,1.0672	1.3323	0.214862	0.8280,2.1438	0.8313	0.60333	0.4774,1.4476
	Intragenic	1.3532	0.399499	0.6663,2.7481	0.2879	0.073633	0.0715,1.1599	0.5212	0.0897468	0.2463,1.1027	0.3253	0.00493645	0.1345,0.7870	2.2153	0.0401485	1.1279,4.3511	0.4115	0.247869	0.1019,1.6616	0.376	0.183686	0.0932,1.5163	0.67	0.671439	0.2485,1.8061	0.8966	1	0.2204,3.6472	1.6182	0.322199	0.5927,4.4179	0.7155	1	0.0989,5.1749	0	0.410536	0.5631,1.8833	1.4419	0.109482	0.9268,2.2431	0.6429	0.168349	0.3526,1.1721	0.9132	1	0.2901,2.8747	0.2633	0.190773	0.0368,1.8850
	Intergenic	1.0475	0.79305	0.7489,1.4651	0.9161	0.680962	0.6557,1.2799	0.9115	0.445947	0.7313,1.1360	0.8566	0.166281	0.6931,1.0587	0.6705	0.0841713	0.4281,1.0500	1.2636	0.149065	0.9176,1.7400	0.5914	0.00627831	0.3985,0.8778	1.0913	0.545295	0.8201,1.4520	0.5237	0.0420027	0.2793,0.9818	1.3007	0.179169	0.8800,1.9226	0.6321	0.108815	0.3636,1.0992	1.1486	0.451644	0.7721,1.7086	0.9519	0.67402	0.7719,1.1738	0.8946	0.298202	0.7314,1.0941	0.9442	0.912888	0.6084,1.4652	0.9958	1	0.6649,1.4915
GSE12453_diffuseLargeBcellsLymphoma_vs_centrocytes	All	0.9408	0.917797	0.6216,1.4238	0.7041	0.0322076	0.5089,0.9740	1.0437	0.743504	0.8105,1.3440	0.7596	0.00493721	0.6251,0.9230	0.7576	0.309523	0.4585,1.2517	0.9468	0.814032	0.6914,1.2966	0.7269	0.178257	0.4723,1.1187	0.9328	0.690126	0.7137,1.2191	0.6107	0.198285	0.3025,1.2332	1.1441	0.43063	0.7943,1.6478	0.7204	0.404385	0.3835,1.3533	1.2195	0.250184	0.8641,1.7211	1.1122	0.377201	0.8754,1.4130	0.8038	0.0204459	0.6689,0.9659	0.6866	0.245865	0.3762,1.2532	0.7642	0.209478	0.5149,1.1343
	Sense	0.951	1	0.5454,1.6579	0.5016	0.0051675	0.2998,0.8392	1.0757	0.666657	0.7752,1.4925	0.7309	0.0199482	0.5608,0.9526	0.427	0.0489569	0.1763,1.0341	1.1642	0.403416	0.7935,1.7082	0.7119	0.336666	0.3790,1.3374	0.9124	0.703862	0.6186,1.3459	0.7304	0.69406	0.3010,1.7727	1.3395	0.222058	0.8418,2.1314	0.6138	0.367694	0.2531,1.4886	1.1823	0.454705	0.7525,1.8577	1.0822	0.623388	0.7931,1.4766	0.8728	0.281848	0.6908,1.1028	0.2634	0.0382687	0.0655,1.0595	0.8184	0.603891	0.4698,1.4256
	Anti-sense	0.9269	1	0.5201,1.6518	0.8688	0.55503	0.5759,1.3109	0.9791	1	0.7004,1.3687	0.7559	0.0343629	0.5845,0.9775	1.1411	0.635919	0.6397,2.0354	0.9317	0.828482	0.6004,1.4459	0.7003	0.26008	0.3934,1.2469	0.9759	1	0.6924,1.3755	0.449	0.228938	0.1437,1.4034	0.8543	0.681812	0.4794,1.5224	0.9703	1	0.4308,2.1850	1.3148	0.257236	0.8052,2.1468	1.1242	0.428636	0.8356,1.5125	0.8034	0.0702725	0.6360,1.0149	1.0043	0.865817	0.5163,1.9534	0.6712	0.193348	0.3858,1.1678
	Intragenic	1.5549	0.294557	0.6880,3.5143	0.2331	0.0195119	0.0579,0.9388	0.4562	0.11897	0.1698,1.2252	0.2632	0.00041502	0.1088,0.6363	2.6322	0.0211941	1.2287,5.6388	0.3332	0.135202	0.0825,1.3449	0.2884	0.27089	0.0404,2.0613	0.4043	0.127124	0.1291,1.2658	0.6833	1	0.0950,4.9138	1.6574	0.23991	0.6715,4.0905	1.1043	0.599615	0.1526,7.9927	0	0.267163	0.8052,2.1468	1.5771	0.0984748	0.9366,2.6555	0.6664	0.141707	0.3908,1.1366	0.4615	0.728077	0.0644,3.3075	0.2132	0.0948686	0.0298,1.5262
	Intergenic	0.9456	0.91429	0.6140,1.4562	0.735	0.0735443	0.5268,1.0254	1.0832	0.546184	0.8387,1.3989	0.816	0.0410589	0.6715,0.9917	0.6148	0.0988175	0.3454,1.0941	1.0128	0.934835	0.7367,1.3925	0.7793	0.321887	0.5063,1.1996	0.9828	0.94553	0.7502,1.2875	0.6466	0.302333	0.3202,1.3060	1.1713	0.416052	0.8084,1.6972	0.6725	0.321234	0.3463,1.3059	1.2709	0.171459	0.9003,1.7941	1.0306	0.795655	0.8014,1.3253	0.8415	0.0725878	0.6986,1.0136	0.6791	0.280242	0.3616,1.2754	0.8355	0.455023	0.5626,1.2406
GSE12453_diffuseLargeBcellsLymphoma_vs_memoryBcells	All	1.1796	0.496874	0.7194,1.9343	0.6971	0.00296944	0.5458,0.8904	1.2644	0.143411	0.9246,1.7291	0.7804	0.00068549	0.6748,0.9025	0.5723	0.17794	0.2695,1.2155	0.7349	0.02065	0.5645,0.9566	1.0008	1	0.6106,1.6406	0.7558	0.011935	0.6067,0.9416	1.2284	0.569836	0.6294,2.3977	0.7358	0.0729179	0.5272,1.0270	0.7555	0.713605	0.3352,1.7026	1.0149	0.884876	0.7654,1.3458	0.993	1	0.7166,1.3759	0.851	0.0206267	0.7428,0.9749	0.7655	0.610075	0.3602,1.6267	0.5072	4.57e-05	0.3554,0.7238
	Sense	1.0227	0.85532	0.5042,2.0746	0.6121	0.00451372	0.4307,0.8697	1.289	0.21253	0.8632,1.9250	0.772	0.00888491	0.6354,0.9381	0.2973	0.0720724	0.0738,1.1977	0.812	0.267471	0.5787,1.1393	1.1376	0.715007	0.5830,2.2198	0.7585	0.0970016	0.5523,1.0418	1.2922	0.600801	0.5305,3.1477	0.8391	0.475559	0.5449,1.2921	0.6438	0.635604	0.2056,2.0165	0.8368	0.45155	0.5623,1.2453	1.1369	0.518308	0.7615,1.6975	0.891	0.214183	0.7480,1.0615	0.4635	0.453649	0.1149,1.8691	0.3702	0.00026041	0.2032,0.6745
	Anti-sense	1.2253	0.570276	0.6278,2.3916	0.7551	0.100546	0.5433,1.0496	1.0887	0.655826	0.7137,1.6608	0.8097	0.026467	0.6707,0.9775	0.819	0.836803	0.3368,1.9913	0.6753	0.0399673	0.4611,0.9890	0.9267	1	0.4752,1.8073	0.7755	0.0879806	0.5829,1.0319	1.0623	0.792606	0.3938,2.8660	0.6203	0.0613171	0.3755,1.0248	0.8429	1	0.2689,2.6425	1.3	0.164581	0.8930,1.8925	1.0046	1	0.6685,1.5098	0.8185	0.0250911	0.6873,0.9747	0.9711	1	0.3991,2.3626	0.5943	0.0159594	0.3833,0.9214
	Intragenic	0.4411	0.730987	0.0617,3.1561	0.5185	0.0607691	0.2559,1.0504	1.2226	0.642858	0.5416,2.7598	0.467	0.00136069	0.2833,0.7697	1.9249	0.210702	0.6107,6.0675	0.459	0.0795161	0.1884,1.1184	0.5067	1	0.0708,3.6277	0.5206	0.0855511	0.2448,1.1072	1.2006	0.568342	0.1667,8.6474	1.0867	0.824726	0.4744,2.4890	0	1	0.2689,2.6425	1.1673	0.777514	0.4222,3.2268	1.6459	0.132302	0.8423,3.2163	0.4378	0.00021332	0.2697,0.7106	1.6402	0.348764	0.4038,6.6623	0.2325	0.01792	0.0575,0.9399
	Intergenic	1.2183	0.397641	0.7325,2.0264	0.7235	0.0111378	0.5624,0.9307	1.2881	0.133097	0.9371,1.7705	0.8214	0.00842572	0.7094,0.9511	0.5346	0.159729	0.2374,1.2039	0.7787	0.072913	0.5954,1.0185	1.0728	0.794152	0.6544,1.7588	0.7717	0.0227004	0.6163,0.9662	1.3007	0.436219	0.6663,2.5393	0.7356	0.0779519	0.5222,1.0362	0.7862	0.710984	0.3488,1.7720	1.0148	0.88276	0.7613,1.3528	0.9586	0.864853	0.6831,1.3452	0.8986	0.135325	0.7832,1.0310	0.7123	0.592353	0.3161,1.6051	0.5549	0.00053293	0.3886,0.7922
GSE12453_diffuseLargeBcellsLymphoma_vs_naiveBcells	All	1.3177	0.218022	0.8592,2.0207	0.733	0.00143975	0.6033,0.8906	1.0874	0.585302	0.8079,1.4636	0.7366	3.6e-07	0.6529,0.8311	0.6024	0.175022	0.3097,1.1716	0.697	0.00093553	0.5600,0.8676	0.7559	0.359361	0.4561,1.2528	0.6764	1.82e-05	0.5612,0.8152	0.7677	0.610845	0.3617,1.6292	0.7987	0.0983498	0.6146,1.0380	0.614	0.319813	0.2729,1.3812	0.935	0.634818	0.7364,1.1872	1.0893	0.547909	0.8177,1.4512	0.8369	0.00167003	0.7486,0.9358	0.9938	1	0.5427,1.8198	0.5162	7.2e-07	0.3883,0.6861
	Sense	1.0467	0.868036	0.5555,1.9723	0.6567	0.00194408	0.4983,0.8655	1.2892	0.181623	0.8966,1.8538	0.7314	0.0001034	0.6222,0.8599	0.2423	0.0281852	0.0602,0.9752	0.7345	0.0325051	0.5510,0.9791	1.1375	0.62222	0.6209,2.0838	0.7358	0.0211232	0.5666,0.9555	0.6235	0.638302	0.1992,1.9516	0.8092	0.276505	0.5661,1.1567	0.7028	0.667784	0.2611,1.8919	0.8069	0.218098	0.5807,1.1212	1.1368	0.494812	0.7908,1.6342	0.8563	0.0352776	0.7407,0.9899	0.7638	0.822908	0.2836,2.0565	0.4528	0.00010856	0.2918,0.7026
	Anti-sense	1.4616	0.173759	0.8352,2.5578	0.7824	0.0760024	0.6009,1.0187	0.9119	0.761835	0.6048,1.3752	0.737	0.00011325	0.6288,0.8639	0.9414	1	0.4433,1.9992	0.6981	0.0183815	0.5146,0.9472	0.4104	0.0365072	0.1693,0.9951	0.634	0.00020469	0.4926,0.8159	0.8646	1	0.3209,2.3292	0.7834	0.233055	0.5422,1.1319	0.455	0.335304	0.1129,1.8340	1.1445	0.429565	0.8262,1.5854	1.0121	0.924893	0.7007,1.4620	0.8451	0.0190429	0.7340,0.9729	1.2829	0.418397	0.6327,2.6014	0.5396	0.00056536	0.3728,0.7811
	Intragenic	3.0303	0.00664832	1.4849,6.1840	0.5387	0.0272509	0.3078,0.9428	1.8692	0.0573808	1.0181,3.4321	0.4449	1.94e-05	0.2949,0.6711	2.6609	0.0452355	1.0858,6.5208	0.4069	0.0124287	0.1909,0.8675	0.8332	1	0.2061,3.3678	0.4227	0.0064932	0.2166,0.8248	1.9864	0.271975	0.4871,8.1000	1.1889	0.588312	0.6161,2.2942	0	1	0.1129,1.8340	0.7301	0.818511	0.2642,2.0176	2.292	0.00484941	1.3560,3.8740	0.4948	5.72e-05	0.3421,0.7157	2.7318	0.0646379	1.0040,7.4326	0.4504	0.0527203	0.1985,1.0220
	Intergenic	1.1811	0.442931	0.7404,1.8839	0.7417	0.00311971	0.6056,0.9083	1.0612	0.689921	0.7810,1.4420	0.7794	4.35e-05	0.6901,0.8802	0.3605	0.0157755	0.1487,0.8740	0.7394	0.0072286	0.5916,0.9241	0.7566	0.346206	0.4494,1.2738	0.7019	0.00015725	0.5805,0.8486	0.6934	0.484724	0.3081,1.5605	0.7587	0.0511372	0.5764,0.9988	0.6389	0.397652	0.2840,1.4375	0.9475	0.716724	0.7439,1.2070	0.9373	0.75753	0.6881,1.2768	0.8771	0.022595	0.7833,0.9822	0.7786	0.629396	0.3847,1.5759	0.5418	8.15e-06	0.4052,0.7245
GSE12453_diffuseLargeBcellsLymphoma_vs_plasmaCells	All	0.8257	0.458426	0.5255,1.2975	0.6865	0.00801225	0.5178,0.9103	0.9754	0.892953	0.7473,1.2731	0.7916	0.00487629	0.6709,0.9340	0.5975	0.0799489	0.3356,1.0637	0.8899	0.456832	0.6738,1.1754	0.6265	0.059529	0.3898,1.0069	0.6895	0.00412403	0.5309,0.8955	0.5666	0.182914	0.2675,1.1998	0.9371	0.798199	0.6648,1.3210	0.609	0.198243	0.3016,1.2300	0.8763	0.508413	0.6220,1.2347	0.8906	0.435217	0.6836,1.1604	0.7844	0.00253698	0.6687,0.9201	0.6622	0.230636	0.3525,1.2439	0.5728	0.00321451	0.3892,0.8431
	Sense	0.5335	0.114064	0.2520,1.1296	0.5649	0.00475339	0.3719,0.8580	0.8368	0.424334	0.5759,1.2160	0.8528	0.150171	0.6883,1.0565	0.5471	0.160829	0.2435,1.2290	1.0319	0.856578	0.7280,1.4627	0.8366	0.67098	0.4579,1.5284	0.5554	0.003867	0.3657,0.8435	0.4617	0.226104	0.1477,1.4432	0.9673	1	0.6086,1.5372	0.52	0.263229	0.1935,1.3976	0.9442	0.914524	0.6137,1.4527	0.8464	0.399632	0.5947,1.2046	0.8489	0.118103	0.6925,1.0407	0.28	0.0528028	0.0696,1.1266	0.5448	0.0335432	0.3063,0.9690
	Anti-sense	1.3357	0.240515	0.8065,2.2120	0.7928	0.234101	0.5482,1.1465	1.1087	0.540643	0.7983,1.5397	0.7627	0.0149891	0.6118,0.9509	0.5932	0.25614	0.2640,1.3329	0.808	0.348101	0.5398,1.2095	0.4904	0.0387287	0.2430,0.9898	0.8521	0.369061	0.6227,1.1661	0.6397	0.537134	0.2378,1.7207	0.8902	0.723153	0.5462,1.4510	0.6812	0.670499	0.2532,1.8329	0.8324	0.624315	0.4954,1.3988	0.9084	0.624999	0.6519,1.2658	0.8231	0.0583836	0.6743,1.0046	0.9461	1	0.4676,1.9139	0.5631	0.0248774	0.3362,0.9433
	Intragenic	1.0885	0.78889	0.4034,2.9371	0.1692	0.00179727	0.0420,0.6810	0.609	0.36841	0.2511,1.4769	0.3867	0.00084825	0.2063,0.7246	1.1611	0.74684	0.3693,3.6503	0.3651	0.0691369	0.1164,1.1446	1.2527	0.567022	0.4637,3.3842	0.3932	0.0683986	0.1460,1.0590	0.7264	1	0.1010,5.2243	1.2018	0.61425	0.4872,2.9643	0	1	0.2532,1.8329	0.3703	0.522402	0.0512,2.6767	0.8705	0.866	0.4304,1.7603	0.6257	0.0501775	0.3902,1.0034	0.9909	1	0.2445,4.0162	0.1548	0.0224084	0.0216,1.1075
	Intergenic	0.9108	0.824284	0.5795,1.4315	0.7275	0.0287752	0.5456,0.9700	0.9894	1	0.7540,1.2981	0.827	0.0249158	0.6997,0.9775	0.6546	0.17982	0.3676,1.1655	0.9583	0.832588	0.7234,1.2693	0.6323	0.0663548	0.3883,1.0297	0.7272	0.0154858	0.5586,0.9467	0.5998	0.225421	0.2832,1.2704	0.9333	0.792837	0.6556,1.3287	0.6339	0.244507	0.3138,1.2803	0.8853	0.555537	0.6253,1.2535	0.9126	0.548229	0.6969,1.1952	0.818	0.0146822	0.6958,0.9617	0.6482	0.264692	0.3338,1.2589	0.6263	0.0155444	0.4253,0.9222
GSE1299_BreastCancerCells	All	1.0829	0.688383	0.7413,1.5820	0.5738	0.157381	0.2830,1.1633	1.0369	0.750861	0.8106,1.3263	0.8873	0.59225	0.6163,1.2776	0.9488	0.912507	0.6104,1.4747	0.7091	0.438677	0.3497,1.4382	0.7157	0.135295	0.4695,1.0910	0.8117	0.599592	0.4631,1.4224	0.6488	0.265101	0.3342,1.2594	0.2834	0.0749547	0.0703,1.1418	0.5386	0.0806057	0.2669,1.0869	0.6752	0.56784	0.2777,1.6416	1.0338	0.759478	0.8150,1.3114	0.7961	0.262554	0.5530,1.1460	0.5852	0.101573	0.3118,1.0984	0.7039	0.482945	0.3122,1.5870
	Sense	0.8942	0.788454	0.5132,1.5584	0.6784	0.567197	0.2790,1.6494	1.1207	0.452249	0.8194,1.5328	1.0558	0.814004	0.6733,1.6557	0.65	0.301687	0.3219,1.3127	0	0.00333822	0.3497,1.4382	0.5322	0.080916	0.2637,1.0741	0.5309	0.25934	0.1972,1.4297	0.5476	0.338471	0.2037,1.4720	0.5462	0.592407	0.1354,2.2040	0.3439	0.0534165	0.1101,1.0737	0.6936	0.804231	0.2213,2.1735	1.2729	0.095516	0.9582,1.6909	0.7392	0.264763	0.4506,1.2126	0.6281	0.366801	0.2590,1.5232	1.0113	0.801228	0.3748,2.7285
	Anti-sense	1.2565	0.332545	0.7704,2.0493	0.4264	0.170545	0.1362,1.3343	0.9173	0.680586	0.6568,1.2813	0.8594	0.643349	0.5305,1.3920	1.167	0.541182	0.6689,2.0360	1.4375	0.282269	0.7074,2.9212	0.8312	0.625488	0.4952,1.3951	1.1173	0.730919	0.5914,2.1109	0.7112	0.565409	0.2931,1.7258	0	0.0542293	0.1354,2.2040	0.7575	0.691935	0.3120,1.8387	0.6012	0.776842	0.1490,2.4268	0.7958	0.19101	0.5722,1.1069	0.859	0.589268	0.5479,1.3466	0.6225	0.319703	0.2771,1.3988	0.4112	0.249037	0.1020,1.6578
	Intragenic	1.9762	0.0729743	0.9713,4.0207	0.9577	1	0.2368,3.8737	1.6838	0.0605575	0.9997,2.8360	0.6471	0.635232	0.2066,2.0273	2.8543	0.00937806	1.3961,5.8357	2.0737	0.182461	0.6575,6.5398	1.9812	0.09792	0.9279,4.2302	1.6661	0.43397	0.5293,5.2445	0.6436	1	0.0895,4.6277	2.6247	0.182232	0.6428,10.7176	0	1	0.3120,1.8387	0	1	0.1490,2.4268	0.9696	1	0.5156,1.8234	0.1882	0.0694533	0.0264,1.3438	0.8777	1	0.2166,3.5562	0.873	1	0.1216,6.2685
	Intergenic	1.062	0.753566	0.7127,1.5826	0.4696	0.0758096	0.2084,1.0578	0.9923	1	0.7683,1.2817	0.8867	0.583761	0.6101,1.2887	0.7804	0.42105	0.4724,1.2890	0.6761	0.418529	0.3180,1.4372	0.6268	0.0436145	0.3951,0.9944	0.799	0.588363	0.4462,1.4307	0.6085	0.198732	0.3014,1.2285	0.2999	0.0717616	0.0744,1.2085	0.5605	0.129473	0.2777,1.1314	0.7026	0.56434	0.2889,1.7084	1.039	0.75299	0.8143,1.3257	0.862	0.479602	0.5988,1.2411	0.5077	0.0498791	0.2516,1.0245	0.7681	0.711862	0.3406,1.7320
GSE3167_bladderCarcinomaSitu	All	1.3269	0.216378	0.8652,2.0351	0.6907	0.0110109	0.5166,0.9234	0.9243	0.695856	0.6747,1.2661	0.943	0.493377	0.8028,1.1077	0.8186	0.589043	0.4585,1.4617	0.6539	0.0096883	0.4711,0.9076	0.7107	0.250315	0.4222,1.1965	0.8468	0.214421	0.6611,1.0847	1.4753	0.170525	0.8429,2.5819	0.384	6.724e-05	0.2257,0.6534	0.8314	0.74134	0.4107,1.6832	0.6569	0.040321	0.4395,0.9819	0.872	0.407817	0.6401,1.1880	0.8715	0.0944901	0.7433,1.0217	1.2903	0.351309	0.7521,2.2136	0.5659	0.00316552	0.3789,0.8452
	Sense	1.276	0.404318	0.7137,2.2813	0.4685	0.0005912	0.2927,0.7499	0.9948	1	0.6644,1.4896	0.895	0.340047	0.7205,1.1117	0.7456	0.589844	0.3312,1.6782	0.4028	0.00036199	0.2320,0.6993	0.6108	0.320522	0.2715,1.3740	0.8992	0.611257	0.6351,1.2731	1.0578	0.814248	0.4349,2.5729	0.4747	0.0217007	0.2447,0.9211	0.5278	0.387073	0.1687,1.6511	0.582	0.0590001	0.3346,1.0125	1.0286	0.845254	0.7044,1.5019	0.9533	0.686996	0.7798,1.1655	0.7688	0.822681	0.2855,2.0702	0.583	0.0651209	0.3277,1.0371
	Anti-sense	1.3521	0.303817	0.7561,2.4178	0.9708	0.930238	0.6853,1.3751	0.8383	0.478526	0.5471,1.2844	0.9362	0.566013	0.7590,1.1548	0.8084	0.850005	0.3590,1.8201	0.902	0.698882	0.6069,1.3407	0.7564	0.5478	0.3887,1.4720	0.7742	0.143206	0.5525,1.0849	1.7809	0.145754	0.8767,3.6178	0.2693	0.00054616	0.1113,0.6517	1.1652	0.624636	0.4788,2.8355	0.7667	0.448675	0.4398,1.3367	0.809	0.344301	0.5404,1.2110	0.7681	0.012862	0.6219,0.9487	1.631	0.148103	0.8639,3.0793	0.5196	0.0154882	0.2989,0.9032
	Intragenic	1.4807	0.354894	0.5478,4.0021	0.2727	0.0108305	0.0872,0.8527	1.5237	0.208826	0.7809,2.9731	0.3292	0.00036302	0.1634,0.6632	0.5166	1	0.0721,3.7000	0.6595	0.453728	0.2705,1.6078	0.8386	1	0.2075,3.3900	0.4206	0.0888956	0.1562,1.1328	0	0.629573	0.8767,3.6178	0.4959	0.441928	0.1220,2.0157	1.5928	0.470985	0.2199,11.5396	0	0.179582	0.4398,1.3367	1.6585	0.112922	0.9039,3.0434	0.554	0.0200905	0.3308,0.9276	1.3457	0.663334	0.3316,5.4605	0	0.00469067	0.2989,0.9032
	Intergenic	1.257	0.304089	0.7966,1.9836	0.7465	0.0543592	0.5566,1.0012	0.941	0.810025	0.6829,1.2966	0.9869	0.901454	0.8388,1.1610	0.8968	0.88751	0.5022,1.6016	0.6577	0.013367	0.4676,0.9251	0.7082	0.237791	0.4134,1.2131	0.8806	0.360933	0.6850,1.1320	1.5625	0.114657	0.8925,2.7353	0.3769	9.069e-05	0.2172,0.6541	0.8653	0.865868	0.4274,1.7521	0.6843	0.067699	0.4577,1.0231	0.7623	0.121252	0.5461,1.0640	0.8968	0.20141	0.7627,1.0545	1.3024	0.332892	0.7445,2.2784	0.6186	0.015951	0.4140,0.9243
GSE5764_ductalAndLobularBreastCancer	All	0.7763	0.0855456	0.5820,1.0356	1.078	0.632341	0.7966,1.4588	0.8563	0.0847331	0.7200,1.0183	0.8883	0.287796	0.7227,1.0918	0.9028	0.560653	0.6705,1.2156	1.0255	0.860946	0.7303,1.4398	0.6143	0.00068667	0.4569,0.8259	0.9993	1	0.7472,1.3365	0.4211	0.00045296	0.2474,0.7167	0.8667	0.65846	0.5467,1.3740	0.6605	0.0503263	0.4346,1.0038	0.8115	0.453058	0.5120,1.2860	0.851	0.0620974	0.7200,1.0058	0.8488	0.118212	0.6938,1.0384	0.9963	1	0.7192,1.3801	0.585	0.0349594	0.3551,0.9638
	Sense	0.7551	0.181299	0.5087,1.1208	0.9973	1	0.6548,1.5188	0.7858	0.0465848	0.6192,0.9972	1.0654	0.594975	0.8260,1.3740	0.7271	0.17379	0.4691,1.1269	0.7666	0.351403	0.4574,1.2850	0.5346	0.00455159	0.3379,0.8456	0.9806	1	0.6439,1.4933	0.3435	0.00365962	0.1531,0.7706	0.8665	0.763967	0.4609,1.6291	0.7924	0.42014	0.4799,1.3084	0.652	0.2646	0.3359,1.2654	0.8899	0.318184	0.7176,1.1035	0.9535	0.752153	0.7408,1.2273	0.7503	0.337728	0.4394,1.2813	0.5476	0.145719	0.2587,1.1592
	Anti-sense	0.8009	0.313811	0.5394,1.1892	1.1065	0.582328	0.7324,1.6717	0.9513	0.703126	0.7654,1.1825	0.7254	0.0303575	0.5414,0.9720	1.0716	0.68684	0.7305,1.5719	1.1855	0.464833	0.7630,1.8420	0.7253	0.0907496	0.5048,1.0421	0.981	1	0.6692,1.4381	0.6002	0.125418	0.3196,1.1272	0.8966	0.878201	0.4768,1.6860	0.4431	0.0249986	0.2093,0.9380	0.9557	1	0.5080,1.7980	0.8089	0.0533865	0.6518,1.0038	0.849	0.221103	0.6576,1.0963	1.181	0.382504	0.7932,1.7585	0.5825	0.11422	0.3003,1.1299
	Intragenic	0.7113	0.508275	0.3347,1.5117	1.0611	0.841614	0.4988,2.2574	1.3882	0.0937301	0.9504,2.0277	1.2516	0.34569	0.7781,2.0135	1.3369	0.428416	0.6818,2.6217	1.5298	0.237383	0.7158,3.2695	0.9427	1	0.4641,1.9148	1.9705	0.0509046	1.0698,3.6296	0.8248	1	0.2607,2.6097	1.6581	0.314375	0.6073,4.5271	0.4338	0.72847	0.0600,3.1359	0	0.408913	0.5080,1.7980	1.2185	0.293154	0.8352,1.7777	0.9095	0.898976	0.5421,1.5259	1.7468	0.1148	0.8862,3.4431	0.2697	0.27547	0.0377,1.9313
	Intergenic	0.7841	0.128096	0.5809,1.0583	1.0502	0.739359	0.7632,1.4452	0.8634	0.111032	0.7231,1.0308	0.8501	0.146605	0.6858,1.0538	0.9232	0.70455	0.6791,1.2552	0.9913	1	0.6924,1.4192	0.6293	0.00181776	0.4651,0.8513	0.9555	0.819008	0.7042,1.2966	0.3806	0.00021411	0.2145,0.6753	0.7671	0.363902	0.4650,1.2653	0.6879	0.0848695	0.4525,1.0457	0.845	0.58485	0.5331,1.3394	0.8247	0.0303554	0.6932,0.9811	0.8625	0.17589	0.7018,1.0601	0.8817	0.545345	0.6165,1.2611	0.6389	0.0769064	0.3877,1.0531
GSE5816_lungAdrenocarcinoma	All	0.7347	0.00024258	0.6208,0.8694	1.0115	0.943839	0.7687,1.3311	0.823	0.00014378	0.7437,0.9107	1.0182	0.82317	0.8553,1.2121	0.9093	0.289302	0.7658,1.0797	0.8024	0.215619	0.5750,1.1198	0.719	2.561e-05	0.6141,0.8419	0.8717	0.358651	0.6643,1.1438	0.7032	0.00325266	0.5539,0.8927	0.8464	0.494877	0.5611,1.2769	0.6359	0.00012094	0.4998,0.8090	0.4186	0.00061132	0.2412,0.7266	0.741	0	0.6702,0.8192	0.9252	0.412384	0.7781,1.1002	0.684	0.00040238	0.5498,0.8509	0.9876	1	0.6973,1.3988
	Sense	0.7873	0.0332549	0.6305,0.9832	1.1173	0.507395	0.7843,1.5916	0.8886	0.0816844	0.7794,1.0132	1.0455	0.680722	0.8335,1.3113	0.8907	0.365153	0.7068,1.1224	0.6273	0.0633011	0.3806,1.0338	0.7142	0.00326348	0.5681,0.8977	0.8517	0.509721	0.5735,1.2650	0.4952	9.833e-05	0.3392,0.7230	1.0848	0.689523	0.6557,1.7947	0.6322	0.00304185	0.4617,0.8656	0.3302	0.00203989	0.1473,0.7403	0.7559	2.025e-05	0.6628,0.8620	0.9071	0.434031	0.7227,1.1387	0.5688	0.00059403	0.4042,0.8005	0.9886	1	0.5980,1.6342
	Anti-sense	0.6909	0.00193973	0.5435,0.8783	0.8442	0.495103	0.5596,1.2736	0.7853	0.00033119	0.6864,0.8985	1.0203	0.861989	0.8145,1.2781	0.8941	0.378518	0.7034,1.1366	1.0429	0.829814	0.6904,1.5754	0.7613	0.00749028	0.6216,0.9325	0.9479	0.864017	0.6727,1.3359	0.8771	0.457639	0.6462,1.1904	0.6163	0.174734	0.3174,1.1966	0.6113	0.00579338	0.4251,0.8789	0.5071	0.0696318	0.2395,1.0738	0.757	1.117e-05	0.6667,0.8594	0.9487	0.665403	0.7642,1.1777	0.7971	0.110868	0.6074,1.0460	1.0242	0.907187	0.6525,1.6074
	Intragenic	0.8786	0.566027	0.5921,1.3037	1.1812	0.596763	0.6254,2.2308	1.0859	0.515478	0.8478,1.3908	1.8963	0.00117819	1.3322,2.6993	1.5546	0.0294406	1.0582,2.2839	1.7124	0.0959088	0.9016,3.2522	0.7418	0.217999	0.4724,1.1650	1.6569	0.0908693	0.9225,2.9759	0.8397	0.753397	0.4353,1.6199	2.3133	0.0398742	1.0678,5.0113	0.6574	0.54907	0.2626,1.6457	1.0109	1	0.2463,4.1485	0.9128	0.500756	0.7122,1.1700	1.5032	0.0333663	1.0415,2.1696	1.3361	0.24268	0.8456,2.1111	2.7386	0.00261801	1.5093,4.9693
	Intergenic	0.7639	0.00191215	0.6422,0.9087	0.9876	1	0.7394,1.3193	0.8222	0.0001818	0.7410,0.9122	0.9672	0.748563	0.8066,1.1598	0.8774	0.170659	0.7320,1.0519	0.7794	0.196309	0.5482,1.1082	0.741	0.00018208	0.6309,0.8704	0.8465	0.279591	0.6375,1.1241	0.6823	0.00175446	0.5324,0.8744	0.7794	0.316032	0.5028,1.2082	0.6541	0.00039165	0.5131,0.8337	0.4013	0.00048259	0.2262,0.7122	0.7261	0	0.6544,0.8056	0.9114	0.32991	0.7621,1.0899	0.6327	6.507e-05	0.5004,0.7999	0.9114	0.712798	0.6261,1.3267
GSE6631_headAneck	All	0.8787	1	0.3860,2.0004	2.2901	0.0540704	1.0916,4.8043	0.8878	0.800813	0.5307,1.4850	1.1848	0.611255	0.6333,2.2164	0.71	0.663512	0.2616,1.9270	0.6382	0.770684	0.1560,2.6099	0	0.00059014	0.6309,0.8704	0.9076	1	0.3298,2.4973	0.2843	0.268966	0.0397,2.0373	1.0515	0.716109	0.2569,4.3033	0.5382	0.590996	0.1328,2.1813	0.4848	0.724883	0.0672,3.4977	1.0254	0.903361	0.6394,1.6445	0.6594	0.328734	0.3147,1.3819	1.9743	0.0742437	0.9608,4.0573	0.8524	1	0.2084,3.4874
	Sense	0.8192	1	0.2599,2.5823	2.6074	0.0512971	1.0451,6.5054	1.0005	1	0.5228,1.9145	1.2947	0.50162	0.5907,2.8375	0.3212	0.378114	0.0448,2.3021	0.5841	1	0.0809,4.2154	0	0.055613	0.6309,0.8704	1.4865	0.461495	0.4659,4.7426	0.5472	1	0.0763,3.9264	2.0265	0.265932	0.4945,8.3058	0.4606	0.727898	0.0642,3.3034	0	0.634954	0.0672,3.4977	1.6091	0.0810657	0.9614,2.6930	0.7891	0.832025	0.3168,1.9654	1.0112	0.726338	0.2492,4.1035	0.9099	1	0.1260,6.5709
	Anti-sense	0.8675	1	0.2752,2.7349	2.1709	0.123948	0.7879,5.9814	0.9646	1	0.5041,1.8458	1.2483	0.512525	0.5696,2.7358	1.0653	0.761528	0.3377,3.3599	0.633	1	0.0877,4.5685	0	0.025012	0.6309,0.8704	0.7949	1	0.1943,3.2519	0	0.426554	0.0763,3.9264	0	1	0.4945,8.3058	0.6023	1	0.0839,4.3220	1.0954	0.602186	0.1516,7.9140	0.7262	0.445738	0.3677,1.4344	0.4226	0.154364	0.1326,1.3465	2.6059	0.0332705	1.1416,5.9483	0.7497	1	0.1039,5.4125
	Intragenic	0	0.630169	0.2752,2.7349	1.7422	0.441165	0.2408,12.6054	0.4298	0.732036	0.0599,3.0825	1.591	0.364668	0.3884,6.5162	4.2188	0.0376294	1.3280,13.4020	2.4855	0.335768	0.3430,18.0123	0	1	0.6309,0.8704	2.0014	0.397779	0.2765,14.4890	2.607	0.322659	0.3603,18.8614	0	1	0.4945,8.3058	0	1	0.0839,4.3220	0	1	0.1516,7.9140	0.3796	0.525961	0.0529,2.7219	0.6905	1	0.0957,4.9842	0	1	1.1416,5.9483	0	1	0.1039,5.4125
	Intergenic	0.9683	1	0.4253,2.2048	2.524	0.0206873	1.2030,5.2959	0.9521	1	0.5692,1.5926	1.1431	0.728262	0.5978,2.1857	0.5775	0.493662	0.1833,1.8195	0.3436	0.532469	0.0476,2.4786	0	0.00087503	0.6309,0.8704	0.9724	1	0.3534,2.6758	0	0.0817946	0.3603,18.8614	1.1129	0.702037	0.2719,4.5547	0.56	0.589133	0.1382,2.2697	0.5044	1	0.0699,3.6393	1.1101	0.619465	0.6922,1.7804	0.7138	0.502044	0.3406,1.4958	2.1547	0.060025	1.0483,4.4290	0.9298	1	0.2272,3.8044
GSE6919_metastasisProstateCancer	All	1.0003	1	0.7419,1.3485	0.9191	0.630435	0.6955,1.2145	1.0631	0.528835	0.8825,1.2807	1.1989	0.0291618	1.0198,1.4095	1.1566	0.356084	0.8493,1.5751	0.9148	0.650353	0.6729,1.2438	0.9251	0.669967	0.6941,1.2329	0.8876	0.405951	0.6823,1.1548	0.7882	0.343385	0.4975,1.2490	0.7665	0.253001	0.5040,1.1658	0.7788	0.306424	0.4971,1.2200	0.8165	0.356296	0.5499,1.2123	0.9946	1	0.8279,1.1949	1.0355	0.673883	0.8796,1.2192	1.0674	0.701668	0.7414,1.5368	0.9644	0.931268	0.6843,1.3592
	Sense	0.7826	0.354397	0.4995,1.2259	0.9892	1	0.6874,1.4235	1.0277	0.799053	0.8028,1.3156	1.4276	0.00068685	1.1721,1.7389	1.2455	0.263554	0.8368,1.8537	0.7897	0.363475	0.5093,1.2244	0.7292	0.220288	0.4604,1.1551	0.8067	0.313655	0.5433,1.1977	0.5463	0.145798	0.2580,1.1567	0.6948	0.296472	0.3806,1.2684	0.526	0.0820501	0.2607,1.0613	0.8041	0.47337	0.4793,1.3491	0.9476	0.716508	0.7438,1.2072	1.1412	0.209613	0.9311,1.3988	1.0986	0.677849	0.6538,1.8460	0.8145	0.533738	0.4768,1.3913
	Anti-sense	1.2308	0.290335	0.8441,1.7947	0.9058	0.703939	0.6141,1.3361	1.1335	0.286361	0.8967,1.4329	1.0914	0.428592	0.8809,1.3522	1.078	0.72678	0.6942,1.6740	1.0757	0.675677	0.7232,1.6001	1.0623	0.710809	0.7459,1.5130	0.9248	0.738314	0.6594,1.2971	0.9869	1	0.5535,1.7596	0.7871	0.508249	0.4418,1.4022	1.0523	0.763457	0.5899,1.8772	0.9125	0.891476	0.5231,1.5916	1.0491	0.681574	0.8372,1.3146	0.9494	0.672862	0.7688,1.1723	0.9633	1	0.5832,1.5913	1.0734	0.733006	0.6977,1.6514
	Intragenic	1.552	0.178543	0.8446,2.8519	1.3577	0.301949	0.7577,2.4329	1.8283	0.00425172	1.2420,2.6915	1.1755	0.41821	0.7706,1.7931	1.8176	0.10594	0.9261,3.5674	1.4507	0.302927	0.7396,2.8453	1.2812	0.418626	0.6303,2.6046	1.4312	0.267546	0.7779,2.6332	2.7465	0.0183506	1.2672,5.9527	0.5892	0.776134	0.1449,2.3952	0.5883	1	0.0814,4.2538	0.4704	0.724762	0.0651,3.4008	1.5433	0.0382795	1.0428,2.2841	0.4785	0.0115768	0.2627,0.8715	1.814	0.121113	0.8453,3.8932	1.0169	0.819442	0.4155,2.4892
	Intergenic	0.9274	0.749905	0.6721,1.2799	0.9138	0.615482	0.6825,1.2235	1.011	0.920935	0.8329,1.2272	1.2282	0.0157411	1.0421,1.4476	1.1447	0.383387	0.8287,1.5811	0.9308	0.752817	0.6773,1.2790	0.9292	0.714322	0.6915,1.2487	0.9188	0.597909	0.7033,1.2005	0.6075	0.0650139	0.3565,1.0355	0.7753	0.282292	0.5051,1.1902	0.7685	0.296983	0.4851,1.2176	0.8159	0.396677	0.5453,1.2208	0.9768	0.847886	0.8082,1.1805	1.1009	0.261146	0.9339,1.2976	0.9674	1	0.6510,1.4378	0.9585	0.928395	0.6699,1.3715
GSE9750_cervicalCancer	All	1.038	0.584572	0.9092,1.1850	0.6877	0.00798213	0.5187,0.9119	0.9079	0.029908	0.8322,0.9905	0.9504	0.557293	0.8132,1.1106	0.9579	0.599092	0.8252,1.1120	0.7495	0.0580956	0.5555,1.0113	0.7114	6.7e-07	0.6193,0.8172	0.9564	0.774272	0.7609,1.2022	0.8159	0.0468053	0.6692,0.9946	0.7121	0.0880807	0.4832,1.0493	0.6891	0.0002346	0.5620,0.8449	0.9861	1	0.7117,1.3662	0.968	0.450923	0.8912,1.0515	0.8761	0.0967825	0.7511,1.0221	0.9751	0.797036	0.8231,1.1551	0.7549	0.121528	0.5363,1.0627
	Sense	0.9122	0.357583	0.7577,1.0983	0.6175	0.0159323	0.4132,0.9228	0.9152	0.137607	0.8160,1.0265	1.0423	0.680605	0.8547,1.2712	0.8078	0.0504977	0.6543,0.9972	0.8398	0.416524	0.5732,1.2303	0.658	3.825e-05	0.5354,0.8087	0.9741	0.934558	0.7031,1.3495	0.7915	0.105504	0.6016,1.0414	0.6502	0.15995	0.3734,1.1324	0.6874	0.00505382	0.5271,0.8964	0.6762	0.133207	0.4097,1.1159	0.9802	0.74477	0.8808,1.0908	0.9529	0.660108	0.7840,1.1581	0.8702	0.321418	0.6749,1.1220	0.8334	0.504351	0.5186,1.3393
	Anti-sense	1.2169	0.0296991	1.0219,1.4491	0.7941	0.267443	0.5491,1.1484	0.9558	0.447659	0.8548,1.0686	0.8521	0.141805	0.6899,1.0525	1.1376	0.193463	0.9350,1.3841	0.6065	0.0304399	0.3830,0.9603	0.7937	0.00888468	0.6660,0.9458	0.8974	0.549284	0.6602,1.2199	0.8719	0.357208	0.6658,1.1417	0.7271	0.285846	0.4255,1.2424	0.6979	0.0175849	0.5166,0.9429	1.3146	0.219965	0.8596,2.0107	1.0036	0.937214	0.9055,1.1123	0.8075	0.0372118	0.6605,0.9872	1.0475	0.692737	0.8423,1.3027	0.6822	0.12623	0.4252,1.0946
	Intragenic	1.5703	0.00370518	1.1728,2.1027	0.7892	0.644422	0.4047,1.5388	1.3912	0.00222241	1.1336,1.7074	0.6298	0.076619	0.3818,1.0388	1.7071	0.00316358	1.2149,2.3986	0.3657	0.096409	0.1166,1.1465	1.2183	0.238162	0.8714,1.7032	0.495	0.13807	0.2036,1.2037	1.2721	0.332418	0.7677,2.1079	0.4645	0.446447	0.1143,1.8877	0.679	0.480265	0.3079,1.4970	1.1552	0.746178	0.3609,3.6976	1.413	0.0006141	1.1658,1.7125	0.5184	0.00809432	0.3097,0.8680	1.5747	0.0288341	1.0631,2.3324	0.6356	0.532806	0.2347,1.7212
	Intergenic	1.0047	0.943126	0.8738,1.1553	0.7287	0.0287565	0.5465,0.9716	0.9003	0.0219474	0.8233,0.9845	0.9837	0.872655	0.8400,1.1520	0.9214	0.327896	0.7873,1.0784	0.7848	0.138074	0.5777,1.0660	0.7014	6e-07	0.6075,0.8098	0.9998	1	0.7932,1.2604	0.7747	0.0150642	0.6297,0.9530	0.755	0.188099	0.5122,1.1130	0.6977	0.00044537	0.5673,0.8580	0.9711	0.932921	0.6951,1.3567	0.9461	0.204692	0.8687,1.0304	0.9106	0.261139	0.7788,1.0648	0.9464	0.561887	0.7920,1.1308	0.826	0.296061	0.5865,1.1634
GSE13911_microsatelliteInstableGastricCancer	All	0.8671	0.168925	0.7126,1.0550	0.7322	0.0520164	0.5372,0.9980	0.7617	2.126e-05	0.6700,0.8660	1.0004	1	0.8419,1.1887	0.9049	0.37593	0.7318,1.1189	0.8415	0.32241	0.6104,1.1603	0.7213	0.00078135	0.5929,0.8774	1.0041	0.948598	0.7802,1.2923	0.7014	0.0179502	0.5208,0.9446	0.7099	0.149145	0.4582,1.1000	0.5954	0.00056104	0.4369,0.8114	0.7646	0.226132	0.5071,1.1529	0.7921	0.00013952	0.7012,0.8948	0.8199	0.0272819	0.6868,0.9789	0.7725	0.0495301	0.5964,1.0007	0.8931	0.601965	0.6244,1.2774
	Sense	0.7968	0.110419	0.6057,1.0482	0.6015	0.0250727	0.3801,0.9519	0.7884	0.00551332	0.6656,0.9338	1.0336	0.772239	0.8262,1.2930	0.6886	0.0214527	0.5010,0.9464	0.5273	0.0143158	0.3095,0.8983	0.7982	0.11304	0.6082,1.0476	0.9911	1	0.6887,1.4263	0.5605	0.00896734	0.3571,0.8798	0.6413	0.189361	0.3415,1.2044	0.5676	0.00483304	0.3759,0.8571	0.7623	0.397005	0.4465,1.3014	0.7578	0.00069471	0.6439,0.8919	0.8269	0.110889	0.6557,1.0428	0.6191	0.0199897	0.4097,0.9355	0.8298	0.614498	0.4857,1.4176
	Anti-sense	0.965	0.84414	0.7436,1.2523	0.8508	0.502216	0.5685,1.2732	0.7753	0.00263288	0.6556,0.9169	0.9309	0.569062	0.7399,1.1713	1.0779	0.563784	0.8189,1.4187	1.2781	0.204006	0.8814,1.8533	0.6801	0.00324284	0.5223,0.8856	0.999	1	0.7182,1.3896	0.8325	0.411126	0.5660,1.2244	0.8018	0.59242	0.4501,1.4286	0.6197	0.0379193	0.3944,0.9738	0.7073	0.336219	0.3763,1.3293	0.9194	0.274314	0.7937,1.0650	0.8581	0.183344	0.6879,1.0705	0.8986	0.583309	0.6521,1.2383	0.9366	0.908773	0.5902,1.4861
	Intragenic	1.663	0.0126034	1.1388,2.4284	0.6704	0.487376	0.2975,1.5106	1.3873	0.0248512	1.0532,1.8275	0.8699	0.725365	0.5345,1.4158	1.2511	0.397659	0.7573,2.0669	0.7985	0.83669	0.3274,1.9474	0.9249	0.899461	0.5549,1.5416	1.042	0.853015	0.5129,2.1169	1.2528	0.444855	0.6292,2.4948	1.2298	0.572142	0.4507,3.3556	1.3491	0.460323	0.5788,3.1442	0.4792	0.72443	0.0663,3.4641	1.4012	0.0128426	1.0816,1.8153	0.7656	0.322359	0.4708,1.2450	1.7735	0.0363878	1.0783,2.9169	1.2539	0.48831	0.5518,2.8489
	Intergenic	0.8194	0.0668011	0.6645,1.0105	0.7485	0.0821936	0.5431,1.0314	0.7376	4.16e-06	0.6456,0.8426	1.0422	0.65207	0.8755,1.2408	0.9509	0.703817	0.7654,1.1814	0.8497	0.382659	0.6087,1.1859	0.7297	0.001674	0.5967,0.8924	1.0072	0.946994	0.7769,1.3059	0.6934	0.0180944	0.5100,0.9429	0.6403	0.0612275	0.3995,1.0262	0.5898	0.0005645	0.4297,0.8097	0.7615	0.218529	0.5007,1.1581	0.7577	1.299e-05	0.6672,0.8605	0.8392	0.0608173	0.7003,1.0056	0.6871	0.00763819	0.5177,0.9120	0.8795	0.586594	0.6043,1.2801
[truncated: 102 more columns]
